# Supplementary material for: Control of neurotransmitter release by two distinct membrane-binding faces of the Munc13-1 C1C2B region
Source: eLife journal article supplement (doi:10.7554/elife.72030), 2021-11-15
Supplement: supp [file elife-72030-supp-v1.zip]

Archive with 19 entries (19 files):
- elife_poa_e72030_Figure_2_source_data_1.xlsx
- elife_poa_e72030_Figure_3_source_data_1.xlsx
- elife_poa_e72030_Figure_4_source_data_1.xlsx
- elife_poa_e72030_Figure_5_source_data_1.xlsx
- elife_poa_e72030_Figure_6_source_data_1.xlsx
- elife_poa_e72030_Figure_7_source_data_1.xlsx
- elife_poa_e72030_Figure_8_source_data_1.xlsx
- elife_poa_e72030_Figure_9_source_data_1.xlsx
- elife_poa_e72030_Figure_10_source_data_1.xlsx
- elife_poa_e72030_Figure_5_figure_supplement_1_source_data_1.xlsx
- elife_poa_e72030_Figure_6_figure_supplement_1_source_data_1.xlsx
- elife_poa_e72030_Figure_6_figure_supplement_2_source_data_1.xlsx
- elife_poa_e72030_Figure_1_figure_supplement_1.pdf
- elife_poa_e72030_Figure_1_figure_supplement_2.pdf
- elife_poa_e72030_Figure_3_figure_supplement_1.pdf
- elife_poa_e72030_Figure_5_figure_supplement_1.pdf
- elife_poa_e72030_Figure_6_figure_supplement_1.pdf
- elife_poa_e72030_Figure_6_figure_supplement_2.pdf
- elife_poa_e72030_Transparent_Reporting_File.docx
