# Supplementary material for: Control of neurotransmitter release by two distinct membrane-binding faces of the Munc13-1 C1C2B region
Source: eLife journal article supplement (doi:10.7554/elife.72030), 2021-11-15
Supplement: supp [file elife-72030-supp-v1.zip › elife_poa_e72030_Figure_2_source_data_1.xlsx]

## Sheet: Fig. 2A
Figure 2A
Uncropped gels

## Sheet: Fig. 2B
Figure 2B
	0.1 mM EGTA				0.5 mM Ca2+
	Mean	StDev			Mean	StDev
WT	1	0			1	0
K603E	0.221949	0.0379445			0.840229	0.109734
K720E	0.443668	0.0163132			0.924314	0.0682176
K706E	0.58918	0.0553718			0.869975	0.137543
R769E	0.268888	0.0687106			0.865923	0.235311
K603E/K720E	0.133223	0.104375			0.877015	0.17311
K720E/R769E	0.186791	0.0681533			0.670245	0.0947082
K603E/K706E/K720E/R769E	0.106485	0.0264739			0.150862	0.027423
