# Supplementary material for: Control of neurotransmitter release by two distinct membrane-binding faces of the Munc13-1 C1C2B region
Source: eLife journal article supplement (doi:10.7554/elife.72030), 2021-11-15
Supplement: supp [file elife-72030-supp-v1.zip › elife_poa_e72030_Figure_3_source_data_1.xlsx]

## Sheet: Fig. 3
Fig. 3
Figure 3 A-H			Figure 3A		Figure 3B		Figure 3C		Figure 3D		Figure 3E		Figure 3F		Figure 3G		Figure 3H
			WT		K603E		K706E		K720E		R769E		K603E/K720E		K706E/R769E		K603E/K706E/K720E/R769E
Radius (nm)	T+V		-Ca2+	+Ca2+	-Ca2+	+Ca2+	-Ca2+	+Ca2+	-Ca2+	+Ca2+	-Ca2+	+Ca2+	-Ca2+	+Ca2+	-Ca2+	+Ca2+	-Ca2+	+Ca2+
0.0281252	0		0	0	0	0	0	0	0	0	0	0	0	0	0	0	0	0
0.0356295	0		0	0	0	0	0	0	0	0	0	0	0	0	0	0	0	0
0.0451361	0		0	0	0	0	0	0	0	0	0	0	0	0	0	0	0	0
0.0571792	0		0	0	0	0	0	0	0	0	0	0	0	0	0	0	0	0
0.0724356	0		0	0	0	0	0	0	0	0	0	0	0	0	0	0	0	0
0.0917628	0		0	0	0	0	0	0	0	0	0	0	0	0	0	0	0	0
0.116247	0		0	0	0	0	0	0	0	0	0	0	0	0	0	0	0	0
0.147263	0		0	0	0	0	0	0	0	0	0	0	0	0	0	0	0	0
0.186556	0		0	0	0	0	0	0	0	0	0	0	0	0	0	0	0	0
0.236333	0		0	0	0	0	0	0	0	0	0	0	0	0	0	0	0	0
0.299391	0		0	0	0	0	0	0	0	0	0	0	0	0	0	0	0	0
0.379273	0		0	0	0	0	0	0	0	0	0	0	0	0	0	0	0	0
0.48047	0		0	0	0	0	0	0	0	0	0	0	0	0	0	0	0	0
0.608669	0		0	0	0	0	0	0	0	0	0	0	0	0	0	0	0	0
0.771073	0		0	0	0	0	0	0	0	0	0	0	0	0	0	0	0	0
0.976809	0		0	0	0	0	0	0	0	0	0	0	0	0	0	0	0	0
1.23744	0		0	0	0	0	0	0	0	0	0	0	0	0	0	0	0	0
1.56761	0		0	0	0	0	0	0	0	0	0	0	0	0	0	0	0	0
1.98588	0		0	0	0	0	0	0	0	0	0	0	0	0	0	0	0	0
2.51575	0		0	0	0	0	0	0	0	0	0	0	0	0	0	0	0	0
3.18699	0		0	0	0	0	0	0	0	0	0	0	0	0	0	0	0	0
4.03734	0		0	0	0	0	0	0	0	0	0	0	0	0	0	0	0	0
5.11458	0		0	0	0	0	0	0	0	0	0	0	0	0	0	0	0	0
6.47924	0		0	0	0	0	0	0	0	0	0	0	0	0	0	0	0	0
8.20802	0		0	0	0	0	0	0	0	0	0	0	0	0	0	0	0	0
10.3981	0		0	0	0	0	0	0	0	0	0	0	0.327482	0	0	0	0	0
13.1725	0		0	0	0	0	0	0	0	0	0	0.692149	4.30262	0	0	0	0	0
16.6871	0		0	0	0	0	0	0	0	0	0	0.607317	0	0	0	0	0	0
21.1395	0		0	0	0	0	0	0	0	0	0	0.0423719	0	0.0386041	0	0	0	0
26.78	0		0	0	0	0	0	0	0	0	0	0	0	0.0902954	0	0	0	0
33.9253	0		0	0	0	0	0	0	0	0	0	0	0	0.0855905	0	0.393707	0	0
42.9772	0		0.0433573	0.0547495	0	0.237764	0	0	0	0	0	0	0.838618	0.0484552	0	0.455377	0	0
54.4443	0		0.190056	0.114866	2.26055	0.0951405	0	0	0.768641	0	2.67394	0	2.69681	0.0128963	2.29338	0.249843	1.32975	0.824501
68.9711	8.22286		0.228687	0.138409	3.93376	0	0.81105	0.0586064	1.32502	0	3.78644	0	4.4527	0	4.45567	0.0598684	5.39849	3.89493
87.3738	19.0506		0.239227	0.173612	6.0768	0	1.27791	0.712403	2.16365	0	3.73593	0	7.7836	0	8.05063	0	10.4028	7.9206
110.687	52.5017		0.372901	0.429342	19.8995	0	0	2.81654	7.80618	0	5.16212	0	29.005	0	30.0968	0	35.3292	29.3342
140.22	20.2249		0	0.334152	29.222	0	0	2.33055	13.1762	4.76039	1.93574	0	43.431	0	45.4277	0	42.9567	42.9634
177.633	0		0	0	6.8457	0	0	0	3.69085	2.1114	2.44056	0.226157	7.16225	0.0274586	7.93788	0.93623	4.58301	8.03314
225.029	0		0	0	15.7603	1.29604	0	0	10.6619	3.9227	26.0143	6.10736	0	2.12021	1.7379	9.55735	0	7.02923
285.071	0		0.695628	0.16369	5.07678	24.4196	0	0	4.46783	1.79148	21.4941	6.98808	0	3.0643	0	9.0044	0	0
361.133	0		2.4509	1.0677	3.91424	44.9086	0	0	4.49933	6.62921	24.262	13.0494	0	6.94896	0	15.6822	0	0
457.49	0		5.15173	3.11523	3.05178	29.0429	0	4.45967	4.4417	15.8954	8.4949	18.3507	0	11.8241	0	20.9861	0	0
579.556	0		7.18079	5.51284	2.02413	0	15.9123	10.9218	3.88811	20.6809	0	17.7775	0	14.1148	0	18.6954	0	0
734.193	0		13.217	12.176	1.62174	0	44.1669	23.3946	5.54191	27.8747	0	21.0379	0	21.9654	0	18.1417	0	0
930.089	0		16.4536	17.379	0.312646	0	36.4952	27.177	6.17811	16.3337	0	13.0282	0	21.5218	0	5.83787	0	0
1178.25	0		14.8426	17.2257	0	0	1.33664	18.4773	5.50748	0	0	2.09288	0	12.8384	0	0	0	0
1492.63	0		15.0876	18.3846	0	0	0	9.65143	5.99625	0	0	0	0	5.29872	0	0	0	0
1890.89	0		12.8163	15.3656	0	0	0	0	6.04501	0	0	0	0	0	0	0	0	0
2395.42	0		8.29936	8.36451	0	0	0	0	5.69634	0	0	0	0	0	0	0	0	0
3034.56	0		2.73034	0	0	0	0	0	5.16501	0	0	0	0	0	0	0	0	0
3844.24	0		0	0	0	0	0	0	2.13636	0	0	0	0	0	0	0	0	0
4869.95	0		0	0	0	0	0	0	0.844162	0	0	0	0	0	0	0	0	0
6169.34	0		0	0	0	0	0	0	0	0	0	0	0	0	0	0	0	0
7815.43	0		0	0	0	0	0	0	0	0	0	0	0	0	0	0	0	0
9900.73	0		0	0	0	0	0	0	0	0	0	0	0	0	0	0	0	0
12542.4	0		0	0	0	0	0	0	0	0	0	0	0	0	0	0	0	0
15889	0		0	0	0	0	0	0	0	0	0	0	0	0	0	0	0	0
20128.4	0		0	0	0	0	0	0	0	0	0	0	0	0	0	0	0	0
25499.1	0		0	0	0	0	0	0	0	0	0	0	0	0	0	0	0	0
32302.7	0		0	0	0	0	0	0	0	0	0	0	0	0	0	0	0	0
