# Supplementary material for: Control of neurotransmitter release by two distinct membrane-binding faces of the Munc13-1 C1C2B region
Source: eLife journal article supplement (doi:10.7554/elife.72030), 2021-11-15
Supplement: supp [file elife-72030-supp-v1.zip › elife_poa_e72030_Figure_4_source_data_1.xlsx]

## Sheet: Fig. 4A
Fig. 4A
x: time (s)	y: Fluorescence (% of maximum)
	0 nM	16.7 nM	44.4 nM	63.2 nM	132 nM	186 nM	1185 nM	531 nM	1057 nM	553 nM	1910 nM	4904 nM	13954 nM
1.0689	0
26.553	0.0025762
52.1209	0.0015285
77.6881	0.0117
103.222	0.0149
128.908	0.0178
154.474	0.0243
180.022	0.0306
205.59	0.0364
231.137	0.0437
256.612	0.0479
282.137	0.0479
349.385	0.0582
374.925	0.0618
400.464	0.0738
426.114	0.0768
451.679	0.0808
477.229	0.0827
502.78	0.0892
528.325	0.0914
553.874	0.0911
579.451	0.097
605.029	0.0991
630.561	0.1023
656.054	0.1002
681.594	0.1062
707.139	0.1108
732.657	0.1124
758.198	0.1152
783.746	0.1177
809.257	0.1232
834.813	0.121
860.367	0.1267
885.978	0.1301
911.528	0.1326
937.073	0.1286
962.633	0.1257
988.201	0.1331
1013.79	0.1342
1039.3	0.1344
1064.87	0.137
1090.44	0.141
1116.03	0.1419
1141.56	0.1417
1167.1	0.144
1192.74	0.1456
1218.29	0.1429
1243.86	0.1466
1269.4	0.1467
1294.97	0.1507
1320.51	0.1533
1346.13	0.1551
1371.68	0.1756
1397.24	0.1698
1422.77	0.1668
1448.31	0.1684
1473.88	0.1681
1499.57	0.1705
1525.17	0.1711
1.0619		0
28.7553		0.0084901
56.4683		0.0239
84.2604		0.0356
112.039		0.0481
139.766		0.0566
167.555		0.0663
195.292		0.0749
223.053		0.0854
250.859		0.0979
278.576		0.0966
376.486		0.0966
404.281		0.1063
431.957		0.1122
459.709		0.124
487.552		0.1312
515.286		0.1342
542.966		0.1406
570.591		0.1468
598.251		0.1473
625.865		0.164
653.656		0.1648
681.353		0.1682
709.088		0.1725
736.767		0.1776
764.483		0.1871
792.219		0.1869
819.943		0.1904
847.647		0.1882
875.367		0.1948
903.042		0.1994
930.713		0.2168
958.432		0.2192
986.097		0.2154
1013.88		0.2262
1041.63		0.2182
1069.3		0.2195
1097.09		0.2208
1124.92		0.2254
1152.68		0.2277
1180.43		0.2304
1208.15		0.2327
1235.96		0.2327
1263.74		0.2382
1291.51		0.2365
1319.21		0.2392
1347.03		0.2458
1374.71		0.2492
1402.42		0.249
1430.1		0.2524
1457.88		0.2555
1485.56		0.2629
1513.35		0.2632
3.2661			0
30.9793			0.013
58.7034			0.0286
86.5035			0.0424
114.191			0.0564
141.999			0.0692
169.793			0.0818
197.516			0.0892
225.311			0.1041
253.002			0.1178
280.825			0.1195
378.708			0.1195
406.5			0.1285
434.193			0.1379
461.945			0.1492
489.766			0.1566
517.423			0.1649
545.12			0.1718
572.749			0.1781
600.417			0.1854
628.116			0.2058
655.81			0.2039
683.514			0.2076
711.311			0.2121
738.9			0.2205
766.64			0.2311
794.426			0.2315
822.186			0.2332
849.798			0.2351
877.515			0.2399
905.161			0.2426
932.948			0.2637
960.581			0.2654
988.312			0.2629
1016.12			0.2739
1043.84			0.27
1071.52			0.2743
1099.34			0.2761
1127.14			0.2772
1154.9			0.2825
1182.65			0.2837
1210.4			0.2884
1238.19			0.2922
1265.97			0.291
1293.74			0.2978
1321.46			0.2978
1349.24			0.3046
1376.84			0.3079
1404.64			0.3108
1432.36			0.3121
1460.01			0.3169
1487.78			0.324
1515.59			0.3236
5.4182				0
33.1174				0.0059542
60.8475				0.016
88.6766				0.0247
116.429				0.0379
144.14				0.0443
171.933				0.0537
199.721				0.0624
227.434				0.0687
255.237				0.0845
283.087				0.0817
380.914				0.0817
408.647				0.0885
436.364				0.0937
464.073				0.104
491.894				0.1103
519.657				0.1154
547.27				0.1222
574.918				0.1249
602.573				0.1313
630.338				0.1542
657.925				0.1515
685.679				0.153
713.438				0.1567
741.054				0.1683
768.849				0.1755
796.581				0.1742
824.333				0.1771
851.931				0.1801
879.73				0.1834
907.312				0.1883
935.078				0.2047
962.707				0.2063
990.462				0.213
1018.24				0.2129
1045.99				0.2114
1073.64				0.2137
1101.58				0.2148
1129.29				0.2155
1157.1				0.2204
1184.81				0.2227
1212.54				0.2285
1240.36				0.2264
1268.1				0.2291
1295.88				0.2312
1323.6				0.2324
1351.4				0.24
1379.01				0.2434
1406.77				0.2417
1434.57				0.2459
1462.15				0.2477
1489.93				0.2536
1517.72				0.2541
7.5753					0
35.2826					-0.0026102
63.0617					0.0053777
90.8408					0.014
118.581					0.0248
146.372					0.0335
174.093					0.0457
201.863					0.0546
229.682					0.0629
257.395					0.0797
285.268					0.0782
383.099					0.0782
410.797					0.0856
438.542					0.0981
466.356					0.1149
494.116					0.1268
521.79					0.139
549.41					0.1488
577.07					0.1609
604.701					0.1715
632.486					0.1971
660.194					0.1996
687.913					0.2038
715.592					0.215
743.279					0.2328
771.041					0.2396
798.756					0.2441
826.471					0.2502
854.167					0.2526
881.873					0.2618
909.538					0.2772
937.247					0.2832
964.936					0.2878
992.7					0.2994
1020.45					0.2965
1048.14					0.2934
1075.9					0.2958
1103.74					0.2982
1131.51					0.3017
1159.24					0.3033
1186.99					0.3081
1214.77					0.3123
1242.54					0.3128
1270.32					0.3163
1298.04					0.3188
1325.83					0.3184
1353.54					0.3327
1381.23					0.3349
1408.92					0.3365
1436.71					0.3429
1464.39					0.3482
1492.16					0.3543
1519.93					0.3536
3.2051						0
28.7091						-0.0028219
54.371						-0.0011226
79.9064						0.004391
105.476						0.0076996
131.136						0.011
156.628						0.017
182.255						0.02
207.806						0.0282
233.262						0.0341
258.77						0.0373
284.334						0.043
351.592						0.043
377.085						0.0442
402.685						0.0588
428.268						0.0629
453.904						0.0673
479.457						0.0719
504.924						0.0819
530.549						0.0853
556.018						0.0899
581.705						0.0939
607.231						0.0997
632.731						0.1047
658.178						0.1096
683.846						0.1151
709.343						0.1218
734.865						0.1281
760.421						0.1344
785.956						0.1398
811.476						0.1438
836.955						0.1481
862.611						0.156
888.123						0.1526
913.764						0.1647
939.287						0.1687
964.865						0.1705
990.335						0.179
1016						0.1792
1041.44						0.1797
1067.1						0.184
1092.59						0.1885
1118.23						0.1909
1143.78						0.192
1169.3						0.1943
1194.96						0.1972
1220.43						0.1956
1246.1						0.1984
1271.65						0.1999
1297.18						0.2029
1322.74						0.2054
1348.37						0.2088
1373.92						0.2337
1399.45						0.2227
1425.01						0.2197
1450.45						0.2246
1476.14						0.2246
1501.81						0.2257
5.3772							0
30.9301							-0.0080195
56.5051							-0.0095962
82.0313							-0.0039773
107.713							-0.00070801
133.285							0.0046328
158.842							0.0098211
184.402							0.017
209.942							0.023
235.429							0.0308
260.929							0.0357
286.48							0.0421
353.719							0.0421
379.29							0.0682
404.944							0.1178
430.486							0.1595
456.039							0.2029
481.599							0.2401
507.142							0.2753
532.688							0.3052
558.264							0.328
583.841							0.3441
609.386							0.359
634.886							0.3744
660.399							0.3825
685.966							0.3946
711.474							0.41
737.008							0.4206
762.553							0.4301
788.076							0.4424
813.612							0.4558
839.178							0.4663
864.78							0.4773
890.341							0.4933
915.89							0.506
941.448							0.5149
967.004							0.5302
992.595							0.5427
1018.13							0.5508
1043.69							0.5595
1069.25							0.5759
1094.85							0.5939
1120.38							0.6069
1145.91							0.6222
1171.57							0.6366
1197.1							0.6501
1222.67							0.6644
1248.23							0.679
1273.78							0.6904
1299.33							0.7009
1324.95							0.7056
1350.5							0.7115
1376.07							0.7419
1401.59							0.7171
1427.13							0.7111
1452.71							0.7052
1478.38							0.703
1503.97							0.698
1.0569								0
28.8059								0.004673
56.6071								0.0162
84.3804								0.0261
112.121								0.0341
140.007								0.043
167.748								0.057
195.473								0.062
223.285								0.0706
251.11								0.0772
278.873								0.0844
384.538								0.0844
412.171								0.1094
439.937								0.1256
467.813								0.1462
495.541								0.1775
523.211								0.1892
550.91								0.1961
578.712								0.2067
606.488								0.2185
634.301								0.2316
662.035								0.2396
689.893								0.2488
717.659								0.2594
745.498								0.2739
773.223								0.2753
801.049								0.2796
828.777								0.2871
856.541								0.2954
884.314								0.2982
912.06								0.3151
939.784								0.3104
967.625								0.3172
995.326								0.3251
1023.07								0.3335
1051								0.3389
1078.69								0.3422
1106.36								0.3406
1134.19								0.3468
1161.79								0.3511
1189.56								0.3549
1217.34								0.3607
1245.08								0.3632
1272.81								0.3669
1300.47								0.3713
1328.23								0.3762
1355.87								0.3872
1383.53								0.3851
1411.22								0.3865
1439.1								0.3913
1466.84								0.3919
1494.65								0.4003
1522.38								0.4016
3.2871									0
31.033									0.0023897
58.7582									0.0147
86.5435									0.0218
114.385									0.0305
142.141									0.0406
169.959									0.0525
197.705									0.0555
225.489									0.0639
253.332									0.0698
281.013									0.0776
386.752									0.1107
414.399									0.1958
442.087									0.2743
469.94									0.3531
497.699									0.4297
525.438									0.4775
553.057									0.5185
580.973									0.5546
608.702									0.5839
636.437									0.619
664.278									0.638
692.144									0.6609
719.884									0.6844
747.704									0.7068
775.488									0.7194
803.26									0.7298
831									0.7462
858.798									0.7582
886.459									0.7654
914.305									0.7913
942.03									0.7906
969.841									0.7957
997.465									0.8095
1025.29									0.8207
1053.22									0.826
1080.84									0.8291
1108.61									0.8307
1136.36									0.8387
1163.96									0.8459
1191.78									0.8506
1219.56									0.854
1247.22									0.8585
1275.05									0.8599
1302.71									0.8646
1330.37									0.8709
1358.08									0.882
1385.74									0.8847
1413.46									0.8839
1441.33									0.8842
1469.06									0.8862
1496.81									0.9006
1524.59									0.9015
5.4211										0
33.1601										0.0044751
60.9293										0.0108
88.7536										0.0205
116.623										0.0247
144.296										0.0349
172.089										0.0443
199.84										0.0474
227.619										0.0544
255.482										0.0611
283.246										0.0698
388.892										0.0698
416.54										0.1221
444.345										0.1861
472.096										0.2635
499.861										0.3412
527.566										0.397
555.315										0.4439
583.134										0.4827
610.917										0.517
638.679										0.5506
666.538										0.5718
694.279										0.595
722.021										0.617
749.877										0.64
777.657										0.6489
805.398										0.6599
833.146										0.6729
861.046										0.685
888.697										0.695
916.434										0.7167
944.172										0.7141
972.019										0.7201
999.615										0.7369
1027.55										0.7473
1055.38										0.7503
1083										0.7542
1110.73										0.7586
1138.51										0.7642
1166.18										0.7711
1193.9										0.7759
1221.7										0.7816
1249.45										0.7816
1277.18										0.7861
1304.94										0.7909
1332.6										0.7966
1360.22										0.8087
1387.87										0.8127
1415.61										0.8093
1443.46										0.813
1471.21										0.814
1499.02										0.8341
1526.72										0.8283
7.6532											0
35.3722											-0.0025491
63.1515											0.0043504
90.8947											0.0075011
118.797											0.0157
146.521											0.0239
174.306											0.0343
202.062											0.0391
229.886											0.0455
257.649											0.0508
285.397											0.0598
391.041											0.0598
418.699											0.1384
446.585											0.2554
474.309											0.3786
501.987											0.4919
529.773											0.5627
557.575											0.6221
585.341											0.659
613.07											0.6927
640.806											0.7272
668.76											0.7453
696.517											0.7629
724.269											0.7836
751.998											0.8036
779.82											0.8153
807.558											0.8202
835.31											0.8415
863.18											0.8483
890.827											0.8557
918.638											0.8772
946.398											0.8718
974.189											0.8781
1001.85											0.8927
1029.77											0.9019
1057.54											0.9023
1085.14											0.9088
1112.97											0.9056
1140.64											0.9117
1168.35											0.9144
1196.12											0.9205
1223.86											0.9224
1251.58											0.9265
1279.33											0.9262
1307.09											0.9345
1334.72											0.9333
1362.39											0.9477
1390.08											0.9504
1417.88											0.9465
1445.7											0.9451
1473.43											0.9485
1501.17											0.9669
1528.95											0.9578
3.3208												0
31.1181												-0.006696
58.9202												-0.00074763
86.6754												0.0041794
114.509												0.0181
142.177												0.0288
169.911												0.0404
197.719												0.0478
225.445												0.056
253.179												0.0658
280.934												0.0749
359.996												0.1486
387.745												0.2681
415.613												0.3766
443.372												0.4742
471.19												0.5577
498.933												0.6146
526.685												0.6646
554.445												0.7083
582.211												0.7446
609.983												0.7786
637.687												0.8089
665.488												0.8356
693.229												0.8485
720.938												0.8715
748.714												0.8876
776.449												0.8999
804.345												0.9064
832.147												0.9173
859.788												0.9284
887.584												0.9355
915.35												0.9374
943.128												0.9503
970.807												0.9577
998.611												0.9596
1026.57												0.9627
1054.38												0.9607
1082.12												0.9678
1109.92												0.9683
1137.72												0.9717
1165.51												0.9761
1193.21												0.9849
1221.14												0.9826
1248.98												0.9923
1276.73												0.9941
1304.43												0.99
1332.12												0.9872
1359.88												0.9869
1387.67												0.9888
1415.34												0.9873
1443.14												0.9878
1470.95												0.9874
1498.71												0.9859
1526.42												0.9902
5.4768													0
33.3221													-0.0158
61.0533													-0.012
88.9025													-0.00052116
116.65													0.00662
144.399													0.0146
172.129													0.0266
199.852													0.0335
227.582													0.0443
255.401													0.0526
283.16													0.0607
362.139													0.1248
389.964													0.3389
417.843													0.5145
445.598													0.6405
473.321													0.7291
501.086													0.78
528.857													0.8188
556.585													0.8489
584.388													0.8721
612.117													0.8907
639.887													0.9111
667.634													0.9249
695.381													0.9336
723.102													0.941
750.856													0.9516
778.684													0.9547
806.479													0.9565
834.362													0.9624
862.002													0.9652
889.721													0.9705
917.574													0.9714
945.26													0.9859
973.051													0.9852
1000.88													0.9813
1028.81													0.9875
1056.52													0.9873
1084.33													0.9906
1112.06													0.9922
1139.93													0.9897
1167.65													0.9928
1195.45													1.0059
1223.37													1.0022
1251.11													1.008
1278.85													1.004
1306.68													1.006
1334.34													1.0014
1362.04													1.0009
1389.81													1.0008
1417.58													0.9983
1445.29													0.9969
1473.11													0.9991
1500.85													0.9998
1528.62													1

## Sheet: Fig.4B
Fig. 4B
x: time (s)	Fluorescence @ 700 s (%max)		x: time (s)	Fluorescence @ 1,500 s (%max)
0	0.1108		0	0.1711
16.7005	0.1725		16.7005	0.2632
44.3591	0.2121		44.3591	0.3236
63.2092	0.1567		63.2092	0.2541
132.225	0.215		132.225	0.3536
186.08	0.1218		186.08	0.2257
1185.53	0.41		1185.53	0.698
531.244	0.2594		531.244	0.4016
1057.39	0.6844		1057.39	0.9015
553.931	0.617		553.931	0.8283
1910.89	0.7836		1910.89	0.9578
4904.9	0.8715		4904.9	0.9902
13954	0.941		13954	1
