# Supplementary material for: Control of neurotransmitter release by two distinct membrane-binding faces of the Munc13-1 C1C2B region
Source: eLife journal article supplement (doi:10.7554/elife.72030), 2021-11-15
Supplement: supp [file elife-72030-supp-v1.zip › elife_poa_e72030_Figure_5_figure_supplement_1_source_data_1.xlsx]

## Sheet: Fig. 5S1A
Fig. 5 S1 A
x: time (s)	y: Fluorescence (% of maximum)
	WT	K603E	K706E	K720E	R769E	K603E/K720E	K706E/R769E	K603E/K706E/K720E/R769E
0.290716	-1.51449e-07
24.2778	0.0105812
48.2075	0.0117315
72.3011	0.0137035
96.2842	0.0159514
120.2	0.0137293
144.06	0.0151415
167.956	0.0148928
191.805	0.0209395
215.769	0.02015
239.751	0.0229301
263.853	0.0220443
287.622	0.0231575
390.915	0.0688922
414.988	0.0814786
438.763	0.0958194
462.755	0.101926
486.583	0.109168
510.337	0.12072
534.182	0.125469
558.011	0.127541
581.86	0.131349
605.827	0.137742
629.894	0.141043
653.867	0.146936
677.922	0.147295
701.692	0.154262
725.722	0.156212
749.688	0.15763
773.751	0.164008
797.818	0.167188
821.589	0.171248
845.538	0.175049
869.426	0.17989
893.222	0.182165
917.143	0.179769
941.007	0.18483
965.035	0.187755
989.022	0.187014
1012.87	0.192988
1036.88	0.194162
1060.74	0.197782
1084.62	0.198769
1108.41	0.200163
1132.22	0.201847
1156.06	0.201884
1180.06	0.202225
1204.11	0.204077
1227.89	0.206328
1251.79	0.207502
1275.86	0.210704
1299.83	0.210573
1323.8	0.210945
1347.8	0.21159
1371.82	0.213412
1395.66	0.215245
1419.47	0.217591
1443.22	0.216647
1467.12	0.218338
1491.05	0.221568
4.76895		0
28.5497		0.00457361
52.4351		0.00513081
76.2119		0.0129631
100.065		0.0128191
123.917		0.0121508
147.859		0.0147519
171.617		0.0343647
195.634		0.0190858
219.425		0.0212814
243.337		0.0256455
267.29		0.0238763
291.179		0.0259138
389.649		0.0558654
413.548		0.0694142
437.727		0.0818445
461.639		0.08895
485.535		0.0987491
509.494		0.107958
533.375		0.113875
557.208		0.116943
581.187		0.12135
604.919		0.12882
628.866		0.132901
652.759		0.140813
676.577		0.141745
700.368		0.145368
724.161		0.147547
747.984		0.149475
771.89		0.151474
795.833		0.156682
819.676		0.16044
843.714		0.165834
867.625		0.169043
891.488		0.169939
915.32		0.171555
939.074		0.172222
962.851		0.173466
986.648		0.177696
1010.51		0.182
1034.4		0.184898
1058.41		0.180419
1082.19		0.181088
1106.09		0.186041
1130.1		0.184967
1153.96		0.191891
1177.86		0.19171
1201.81		0.196188
1225.72		0.19912
1249.66		0.198759
1273.63		0.199516
1297.53		0.199609
1321.33		0.20185
1345.13		0.201365
1369.02		0.204077
1392.86		0.208121
1416.73		0.207655
1440.74		0.210445
1464.64		0.209811
1488.6		0.209401
9.29809			-3.26141e-08
33.2009			0.000405334
57.0132			0.00688647
80.857			0.0115066
104.6			0.0139531
128.475			0.0116327
152.551			0.0136563
176.218			0.0167828
200.164			0.0200006
224.012			0.0202742
247.99			0.0240602
271.845			0.0237553
295.793			0.0251567
394.286			0.0485624
418.252			0.0600662
442.346			0.0661577
466.211			0.0733571
490.158			0.0817113
514.047			0.0866499
537.878			0.0903711
561.892			0.0939322
585.74			0.10207
609.639			0.102992
633.502			0.107043
657.344			0.11177
681.114			0.114669
704.927			0.119137
728.767			0.120506
752.702			0.122856
776.55			0.127797
800.451			0.128353
824.361			0.132828
848.269			0.135528
872.12			0.135986
896.09			0.137731
919.936			0.141116
943.671			0.137672
967.447			0.144123
991.195			0.146752
1015.11			0.150764
1039.01			0.152259
1062.98			0.155199
1086.78			0.154479
1110.74			0.159091
1134.7			0.162563
1158.6			0.162881
1182.49			0.16513
1206.37			0.169275
1230.27			0.172317
1254.33			0.171775
1278.14			0.176051
1302.19			0.174579
1325.89			0.17428
1349.74			0.177855
1373.61			0.173604
1397.42			0.180385
1421.43			0.180363
1445.37			0.184478
1469.32			0.181687
1493.21			0.185778
24.3692				-8.02081e-08
48.3487				-0.00127844
72.3374				-0.00595866
96.1032				-0.00490881
120.094				-0.00118195
143.933				0.00161699
167.752				0.00530408
191.667				0.00867795
215.566				0.00701893
239.405				0.0124838
263.289				0.0117796
287.225				0.0130448
383.905				0.0567468
407.862				0.0722194
431.781				0.085811
455.58				0.100097
479.663				0.106324
503.406				0.113078
527.4				0.123536
551.161				0.124764
575.036				0.134861
598.825				0.140425
622.859				0.147047
646.786				0.151725
670.745				0.156353
694.542				0.162585
718.313				0.161829
742.059				0.165405
766.12				0.171253
789.897				0.175304
813.869				0.177661
837.903				0.183093
861.778				0.185548
885.701				0.190506
909.623				0.19304
933.412				0.19702
957.419				0.20102
981.579				0.204361
1005.59				0.207149
1029.48				0.206011
1053.37				0.210195
1077.06				0.214005
1101				0.216077
1124.72				0.21562
1148.76				0.219412
1172.83				0.22219
1196.8				0.226384
1220.61				0.226275
1244.61				0.227171
1268.52				0.229011
1292.42				0.232054
1315.94				0.237424
1340.07				0.238696
1363.94				0.239806
1387.76				0.240487
1411.51				0.241143
1435.39				0.237769
1459.34				0.243146
1483.41				0.24545
0.259628					0
24.0872					0.00251809
48.0699					0.00383948
71.8476					0.00450237
95.7922					0.0103
119.661					0.0130764
143.408					0.012425
167.127					0.0129101
191.115					0.0133306
214.922					0.0122255
238.781					0.0146535
262.564					0.0148434
286.414					0.0165039
381.992					0.0375304
405.855					0.0497248
429.807					0.0581781
453.512					0.0672955
477.459					0.0694849
501.286					0.0746638
525.02					0.0844511
548.843					0.0883287
572.857					0.0941134
596.667					0.0968701
620.339					0.101391
644.161					0.109804
667.958					0.110032
691.902					0.112772
715.784					0.115628
739.735					0.122696
763.562					0.122345
787.435					0.12741
811.384					0.130196
835.245					0.133435
858.96					0.135493
882.806					0.133424
906.694					0.13587
930.897					0.136805
954.524					0.139924
978.42					0.145023
1002.29					0.14743
1026.13					0.150165
1050.12					0.152428
1074.09					0.15183
1097.93					0.152912
1121.69					0.155647
1145.62					0.156508
1169.56					0.16078
1193.5					0.163874
1217.52					0.168729
1241.35					0.165863
1265.19					0.16565
1289.14					0.167654
1313.02					0.168893
1337.01					0.171795
1361.06					0.173129
1384.95					0.176182
1408.88					0.178767
1432.94					0.17879
1456.91					0.179881
1480.86					0.182064
4.94282						-7.10331e-08
28.7064						0.00317589
52.6041						0.00468442
76.3408						0.00792452
100.379						0.0105765
124.176						0.0112545
147.915						0.0121898
171.769						0.0126858
195.693						0.0145486
219.493						0.0137858
243.331						0.015644
267.173						0.0162065
291.037						0.0190903
386.568						0.0416935
410.491						0.0554434
434.315						0.0609704
458.125						0.0693117
482.121						0.0760961
505.845						0.0803606
529.626						0.0839718
553.466						0.0919796
577.51						0.0952268
601.129						0.0985253
624.882						0.101086
648.722						0.107201
672.593						0.111124
696.48						0.114951
720.388						0.117796
744.24						0.12109
768.11						0.125197
791.993						0.125973
816						0.132143
839.761						0.130782
863.541						0.129723
887.445						0.1339
911.4						0.135064
935.376						0.138014
959.198						0.138285
983.087						0.140099
1006.87						0.143797
1030.74						0.146189
1054.77						0.143916
1078.64						0.147314
1102.47						0.149859
1126.31						0.151167
1150.22						0.153502
1174.1						0.15426
1198.13						0.156121
1222.12						0.159499
1245.89						0.159603
1269.76						0.162273
1293.77						0.16241
1317.67						0.16377
1341.64						0.162093
1365.63						0.164347
1389.47						0.169158
1413.6						0.171284
1437.59						0.172965
1461.58						0.172164
1485.47						0.171137
9.49125							3.49616e-08
33.3356							0.00135873
57.2313							0.00405844
80.971							0.00519644
104.892							0.00787719
128.752							0.009092
152.487							0.0116003
176.455							0.0110547
200.235							0.00970716
224.092							0.0125148
247.958							0.0116754
271.806							0.0133329
295.563							0.013707
391.228							0.0144353
414.984							0.0239718
438.904							0.0275925
462.701							0.0349785
486.703							0.040909
510.408							0.0414124
534.182							0.0467509
558.092							0.0485839
582.071							0.0544957
605.739							0.0575763
629.444							0.0605722
653.35							0.0665139
677.137							0.0657286
701.063							0.0692373
724.945							0.0741093
748.811							0.0760646
772.729							0.0743543
796.571							0.0785707
820.568							0.0833467
844.361							0.0816826
868.101							0.0847348
892.014							0.0840208
916.064							0.0862719
939.913							0.0875929
963.768							0.091191
987.626							0.0939722
1011.44							0.0960286
1035.36							0.0980125
1059.45							0.0987566
1083.21							0.099939
1107.1							0.10002
1130.9							0.103265
1154.76							0.105399
1178.66							0.108403
1202.8							0.11019
1226.66							0.111149
1250.58							0.110095
1274.44							0.112442
1298.44							0.113154
1322.41							0.115288
1346.24							0.11748
1370.19							0.11977
1394.11							0.121686
1418.21							0.122749
1442.23							0.122504
1466.21							0.121569
1490.19							0.123375
13.9962								1.02274e-07
37.9918								0.00287366
61.7945								0.0137946
85.6611								0.00600474
109.588								0.00928124
133.324								0.0102358
157.022								0.00974847
181.064								0.00863288
204.838								0.0107431
228.74								0.00969861
252.495								0.0141728
276.351								0.0113888
300.145								0.0118847
395.746								0.000634501
419.688								0.00212097
443.469								0.00564114
467.359								0.00676531
491.21								0.0114104
514.953								0.0126438
538.679								0.0149527
562.813								0.019223
586.612								0.0209834
610.242								0.0234592
634.069								0.0261704
657.864								0.0276393
681.73								0.0296374
705.694								0.0329584
729.612								0.0343156
753.441								0.038806
777.331								0.0393195
801.314								0.0417943
825.116								0.0449516
848.904								0.0463123
872.695								0.0457433
896.599								0.045826
920.769								0.049824
944.436								0.0476045
968.3								0.0501369
992.167								0.0524418
1016.05								0.0569699
1040								0.0566612
1063.97								0.0554759
1087.88								0.0585684
1111.61								0.0601814
1135.56								0.06202
1159.44								0.0639076
1183.37								0.0653796
1207.44								0.0679174
1231.2								0.0669395
1255.09								0.0664625
1279.09								0.0688122
1302.95								0.0684952
1326.95								0.0683128
1350.95								0.0708298
1374.84								0.0713332
1398.8								0.0758888
1422.8								0.0744462
1446.77								0.0754768
1470.8								0.076012
1494.98								0.0765643

## Sheet: Fig. 5S1B
Fig. 5 S1 B
x: time (s)	y: Fluorescence (% of maximum)
	WT	K603E	K706E	K720E	R769E	K603E/K720E	K706E/R769E	K603E/K706E/K720E/R769E
2.07052	1.00247e-07
26.0378	0.00170355
49.9846	0.00595721
74.1112	0.0046483
98.0143	0.00737906
121.956	0.00521247
145.862	0.00175996
169.748	0.000733351
193.569	0.0024933
217.534	-0.000518817
241.522	-0.000970017
265.62	0.00456932
289.398	-0.00257174
392.729	0.0152688
416.737	0.0159801
440.519	0.0244719
464.481	0.02463
488.366	0.0278493
512.084	0.0334645
535.96	0.0379172
559.823	0.0382563
583.621	0.0380302
607.598	0.0432301
631.673	0.0442815
655.655	0.0505347
679.716	0.0470743
703.441	0.0458418
727.492	0.0486913
751.477	0.0503086
775.559	0.0449825
799.559	0.0498336
823.337	0.0541089
847.302	0.059743
871.168	0.057763
894.953	0.0604106
918.885	0.058487
942.783	0.0602408
966.807	0.0613045
990.796	0.0611574
1014.67	0.0658993
1038.6	0.0684914
1062.52	0.0682763
1086.39	0.0705857
1110.17	0.0691819
1133.98	0.0691932
1157.81	0.0723405
1181.87	0.0692611
1205.87	0.0733482
1229.66	0.0775155
1253.57	0.0729972
1277.61	0.0765642
1301.59	0.068265
1325.57	0.0756695
1349.55	0.0775041
1373.62	0.0723745
1397.46	0.0778213
1421.22	0.0761678
1444.96	0.078614
1468.92	0.0757828
1492.81	0.0773229
6.54802		9.13364e-08
30.3358		-0.00629848
54.1801		-0.00848784
78.0169		-0.0117037
101.85		-0.0182354
125.661		-0.018461
149.64		-0.0205926
173.392		-0.0177391
197.388		-0.0186076
221.223		-0.0196002
245.141		-0.0206941
269.016		-0.0187994
292.931		-0.0220587
391.436		-0.0133622
415.364		-0.00965013
439.511		-0.0107221
463.39		-0.005136
487.32		-0.000316019
511.266		0.00056459
535.12		0.000338791
559.008		0.00177264
582.942		0.0086611
606.725		0.00774626
630.594		0.00758815
654.534		0.0104909
678.361		0.013541
702.172		0.00973411
725.933		0.0101972
749.788		0.0164446
773.653		0.015439
797.588		0.0136539
821.49		0.0190774
845.453		0.0210325
869.36		0.0194051
893.239		0.0214507
917.119		0.0272946
940.799		0.022061
964.599		0.0246606
988.443		0.0259493
1012.24		0.0283799
1036.14		0.0278599
1060.16		0.0260737
1083.98		0.0239937
1107.89		0.0250676
1131.86		0.0294879
1155.72		0.0301437
1179.6		0.0348366
1203.6		0.0344182
1227.45		0.0355944
1251.43		0.0330385
1275.4		0.0337622
1299.3		0.0356961
1323.13		0.0338527
1346.86		0.0358432
1370.8		0.036748
1394.59		0.0402886
1418.51		0.0381393
1442.48		0.0419742
1466.41		0.0388972
1490.33		0.0417366
11.0472			8.68809e-08
34.9709			-0.00492281
58.7603			-0.00330074
82.6641			-0.0054522
106.381			-0.00991202
130.283			-0.0126482
154.346			-0.0114209
178.024			-0.0117475
201.935			-0.0130085
225.799			-0.00768223
249.754			-0.016825
273.606			-0.00945033
297.535			-0.0125919
396.057			-0.00777232
420.028			-0.00430328
444.111			-0.00349223
468.023			0.00100284
491.944			0.0035043
515.852			0.00334655
539.654			0.0072571
563.664			0.00265918
587.48			0.01251
611.389			0.00929722
635.274			0.0112924
659.139			0.0137727
682.868			0.0122507
706.704			0.0149001
730.557			0.0138516
754.522			0.0182942
778.321			0.0186777
802.213			0.0205949
826.114			0.0201889
850.087			0.0248473
873.872			0.0275774
897.894			0.0229409
921.683			0.0260318
945.451			0.0239336
969.228			0.0265621
992.965			0.0290216
1016.88			0.0328019
1040.79			0.0347317
1064.75			0.0341336
1088.55			0.0327454
1112.56			0.0344496
1136.51			0.0335919
1160.39			0.0385357
1184.25			0.0418435
1208.13			0.0416741
1232.05			0.0477832
1256.09			0.0446212
1279.89			0.0406355
1303.95			0.0475122
1327.67			0.040929
1351.53			0.0422387
1375.35			0.0478058
1399.2			0.0487206
1423.21			0.0491498
1447.17			0.0470604
1471.08			0.0494661
1495.02			0.0500082
26.0982				8.46532e-08
50.1438				-0.00133308
74.0935				-0.00337785
97.9003				-0.00532073
121.873				-0.00796365
145.689				-0.00747801
169.506				-0.00294858
193.457				-0.00211259
217.313				-0.00378451
241.181				-0.00756837
265.083				-0.00972541
289.009				-0.00945438
385.664				0.0020452
409.6				0.00676896
433.555				0.0172603
457.339				0.0173168
481.414				0.0207209
505.213				0.0230057
529.174				0.0266257
552.909				0.0281078
576.8				0.0298164
600.605				0.0355316
624.667				0.0378068
648.546				0.0379652
672.516				0.0404219
696.315				0.0422447
720.047				0.0442489
743.845				0.0479295
767.895				0.0476124
791.655				0.0477143
815.604				0.0493113
839.672				0.053412
863.565				0.0579328
887.426				0.0528682
911.364				0.0605052
935.193				0.0620352
959.233				0.0636221
983.376				0.0618766
1007.36				0.0632593
1031.27				0.0696078
1055.13				0.070719
1078.81				0.0669435
1102.74				0.0767069
1126.51				0.071524
1150.52				0.0742571
1174.61				0.0745179
1198.6				0.0789528
1222.36				0.0806771
1246.41				0.0807338
1270.31				0.0778412
1294.17				0.0811649
1317.7				0.0835929
1341.82				0.0872127
1365.74				0.0836724
1389.49				0.0858964
1413.29				0.0873262
1437.18				0.085363
1461.14				0.0879277
1485.19				0.0867588
2.06473					-5.56929e-08
25.8613					-0.00439962
49.869					-0.00314754
73.6059					-0.00337315
97.5443					-0.000327252
121.421					-0.00125235
145.163					-0.00187282
168.862					-0.00401611
192.909					-0.00192922
216.663					-0.00686971
240.592					-0.00501999
264.322					-0.00633963
288.2					-0.00558395
383.76					-0.00534708
407.64					-0.000293401
431.548					0.00276426
455.254					0.00156822
479.234					-0.00144412
503.021					0.00406194
526.78					0.00846339
550.622					0.00578854
574.665					0.0102468
598.409					0.00975014
622.134					0.00990816
645.955					0.0126174
669.739					0.0138819
693.64					0.0130803
717.584					0.0146158
741.49					0.0169643
765.35					0.0183759
789.182					0.0177322
813.148					0.0190309
837.021					0.0197536
860.714					0.0232097
884.581					0.0237067
908.47					0.024328
932.632					0.0238988
956.319					0.0211315
980.188					0.0215607
1004.03					0.02661
1027.93					0.0285532
1051.9					0.0282369
1075.82					0.0285871
1099.71					0.0278866
1123.46					0.0313442
1147.4					0.0325533
1171.35					0.0324516
1195.25					0.0313894
1219.3					0.0376393
1243.08					0.0319092
1267					0.0341016
1290.88					0.0321804
1314.77					0.0324516
1338.78					0.037142
1362.82					0.0408838
1386.7					0.0398437
1410.68					0.0374133
1434.69					0.0414038
1458.69					0.0412569
1482.64					0.0388036
6.69589						1.11386e-08
30.4585						-0.00602373
54.3692						-0.00461385
78.1429						-0.00231269
102.128						-0.000428704
125.99						-0.00386939
149.726						-0.00689218
173.564						-0.00319258
197.485						-0.00485072
221.238						-0.00485072
245.11						-0.00735458
268.924						-0.0101062
292.793						-0.00574177
388.369						-0.00476048
412.255						-0.00232397
436.065						0.00173754
459.864						0.00200835
483.856						0.001038
507.64						0.00522435
531.407						0.00672533
555.217						0.00638675
579.271						0.00669148
602.882						0.0132271
626.647						0.0140965
650.522						0.0118837
674.373						0.0112177
698.279						0.0132497
722.142						0.0130917
746.038						0.0145142
769.865						0.0134078
793.718						0.0178
817.787						0.0169644
841.51						0.0184663
865.337						0.0185905
889.232						0.0172467
913.21						0.0217753
937.124						0.0180259
960.972						0.0216737
984.854						0.0252318
1008.68						0.0237746
1032.51						0.0194036
1056.55						0.025695
1080.38						0.0267682
1104.22						0.0288583
1128.08						0.0296041
1151.94						0.0326212
1175.84						0.0340338
1199.9						0.0314572
1223.89						0.0280561
1247.71						0.0302933
1271.53						0.0292877
1295.55						0.0347119
1319.49						0.0341129
1343.37						0.0283838
1367.38						0.0346893
1391.22						0.0363621
1415.37						0.0339434
1439.38						0.0361474
1463.38						0.0319318
1487.23						0.0346441
11.2461							0
35.1107							0.000979727
58.9814							0.00237622
82.7771							0.00129506
106.707							1.12631e-05
130.574							-0.0028488
154.275							-0.00159899
178.28							-0.00126118
202.057							-0.00130622
225.89							7.88257e-05
249.716							-0.00459393
273.596							-0.0006306
297.386							-0.00283755
392.99							-0.00510056
416.746							-0.00798241
440.634							-0.0072057
464.474							-0.00988464
488.461							-0.00629388
512.189							-0.00891668
535.929							-0.00230836
559.877							-0.00565221
583.858							-0.00168908
607.498							-0.00465023
631.251							0.000168928
655.104							-0.0021845
678.93							0.000146383
702.808							-0.000405389
726.755							-0.000867072
750.567							-0.000788243
774.48							0.000270267
798.384							0.00394174
822.324							-0.000551783
846.144							-0.00042791
869.859							0.00115991
893.796							-0.000731938
917.849							0.00105857
941.666							0.00414448
965.53							0.00436973
989.418							0.00466259
1013.22							0.00789553
1037.12							0.00377279
1061.19							0.00586785
1085							0.00380658
1108.85							0.00567635
1132.71							0.00694925
1156.55							0.0104079
1180.45							0.0109262
1204.58							0.00875173
1228.47							0.00789553
1252.34							0.00933756
1276.2							0.00601428
1300.19							0.00788426
1324.18							0.00839122
1348.04							0.0105769
1371.98							0.00890944
1395.91							0.0105544
1419.98							0.00960795
1444.01							0.0112867
1467.97							0.0114783
1491.98							0.00916857
15.7702								0
39.7669								0.000787921
63.5416								-0.00441172
87.4732								-0.00228477
111.374								-0.000720354
135.124								-0.00380405
158.836								-0.00672973
182.822								-0.00427668
206.628								-0.00388282
230.504								-0.00441172
254.27								-0.0021272
278.112								-0.00675223
301.907								-0.000990465
397.56								-0.0120061
421.508								-0.0120174
445.214								-0.0113087
469.154								-0.0131197
492.988								-0.0117362
516.723								-0.0164039
540.487								-0.0133334
564.556								-0.0122873
588.365								-0.0136484
612.033								-0.0135247
635.84								-0.0166851
659.649								-0.0150206
683.555								-0.0130972
707.491								-0.0117699
731.423								-0.0117474
755.245								-0.0150093
779.136								-0.012771
803.083								-0.0116462
826.908								-0.0115899
850.641								-0.0139183
874.487								-0.0134572
898.398								-0.0109712
922.599								-0.00954249
946.198								-0.0114774
970.088								-0.0116012
993.979								-0.0126473
1017.81								-0.01087
1041.8								-0.0116349
1065.78								-0.0125123
1089.63								-0.01096
1113.37								-0.014402
1137.31								-0.0120399
1161.24								-0.00858619
1185.18								-0.0106225
1209.21								-0.00942999
1233								-0.0109375
1256.88								-0.0114662
1280.83								-0.0146157
1304.71								-0.0120624
1328.71								-0.00917122
1352.76								-0.00784363
1376.64								-0.00983499
1400.56								-0.0102062
1424.62								-0.00672973
1448.59								-0.0105212
1472.54								-0.00921623
1496.76								-0.0149081

## Sheet: Fig. 5S1C
Fig. 5 S1 C
	y: Fluorescence (% of maximum) at 1500 s
	AVG.	StDev																									2nd	3rd	avg.
WT	0.1811	0.0366845
K603E	0.220967	0.0100182
K706E	0.195933	0.00956312
K720E	0.239533	0.00719884
R769E	0.188067	0.00931468
K603E/K720E	0.186	0.0294297
K706E/R769E	0.136767	0.0190663
K603E/K706E/K720E/R769E	0.0855333	0.0156465

## Sheet: Fig. 5S1D
Fig. 5 S1 D
	y: Fluorescence (% of maximum) at 1500 s
	AVG.	StDev																									2nd	3rd	avg.
WT	0.0565	0.0179357
K603E	0.0652333	0.0204094
K706E	0.068	0.0174468
K720E	0.0829333	0.0163283
R769E	0.0551667	0.0193081
K603E/K720E	0.0564333	0.026689
K706E/R769E	0.0178667	0.00823974
K603E/K706E/K720E/R769E	-0.00950257	0.00393133
