# Supplementary material for: Control of neurotransmitter release by two distinct membrane-binding faces of the Munc13-1 C1C2B region
Source: eLife journal article supplement (doi:10.7554/elife.72030), 2021-11-15
Supplement: supp [file elife-72030-supp-v1.zip › elife_poa_e72030_Figure_5_source_data_1.xlsx]

## Sheet: Fig. 5A
Fig. 5A
x: time (s)	y: Fluorescence (% of maximum)
	WT	K603E	K706E	K720E	R769E	K603E/K720E	K706E/R769E	K603E/K706E/K720E/R769E
0.2632	0
24.1446	-0.0014662
48.0726	-6.5623e-05
71.93	0.0028157
95.6583	0.0025122
119.687	0.0022371
143.568	0.0014776
167.346	0.0033181
191.128	0.0044297
215.026	0.0027146
239.016	0.0033394
263.003	0.0034602
286.756	0.0051615
310.757	0.0424
334.825	0.0748
358.824	0.1009
382.742	0.1212
406.714	0.1365
430.574	0.1477
454.592	0.1592
478.336	0.1675
502.443	0.1783
526.499	0.1853
550.652	0.1896
574.622	0.1967
598.615	0.1983
622.659	0.2004
646.668	0.2029
670.802	0.2103
694.806	0.2113
718.837	0.214
742.673	0.218
766.531	0.2182
790.51	0.2205
814.409	0.2219
838.225	0.2277
862.199	0.2276
886.032	0.228
909.769	0.23
933.527	0.2328
957.465	0.229
981.288	0.2297
1005.09	0.2352
1028.92	0.2317
1052.69	0.236
1076.76	0.2419
1100.66	0.2382
1124.68	0.2355
1148.74	0.2338
1172.65	0.2346
1196.75	0.2363
1220.78	0.2359
1244.81	0.2353
1268.73	0.2408
1292.77	0.2456
1316.74	0.2468
1340.76	0.2422
1364.6	0.2392
1388.64	0.241
1412.57	0.2427
1436.69	0.2434
1460.7	0.2441
1484.75	0.2449
4.9064		0
28.7538		2.1865e-05
52.6548		-0.0049606
76.5412		-0.0023495
100.332		-0.0029475
124.232		-0.0049538
148.241		-0.0031944
171.844		-0.0033086
195.732		-0.0023798
219.663		-0.005219
243.548		-0.0039685
267.514		-0.002578
291.388		-0.0035521
315.437		0.0401
339.487		0.0822
363.432		0.1157
387.364		0.1402
411.294		0.1592
435.179		0.1728
459.126		0.1834
482.962		0.1912
507.113		0.1979
531.167		0.2022
555.277		0.2056
579.145		0.2088
603.312		0.2099
627.306		0.2109
651.347		0.2138
675.356		0.216
699.421		0.2182
723.465		0.2188
747.253		0.2213
771.067		0.2202
795.111		0.2215
818.987		0.2211
842.929		0.2271
866.711		0.2276
890.546		0.2251
914.332		0.2243
938.128		0.2269
962.035		0.2244
985.819		0.2253
1009.69		0.2299
1033.5		0.228
1057.31		0.2282
1081.4		0.2362
1105.32		0.2305
1129.35		0.2304
1153.39		0.2292
1177.3		0.2285
1201.42		0.2286
1225.45		0.2312
1249.46		0.2299
1273.33		0.2319
1297.34		0.2348
1321.29		0.2392
1345.25		0.2316
1369.31		0.2336
1393.26		0.2319
1417.25		0.2322
1441.37		0.2314
1465.28		0.2347
1489.23		0.2378
9.4406			0
33.3259			0.0012653
57.288			3.592e-05
81.0763			0.0028086
104.919			0.0021796
128.881			0.0035815
152.74			0.0026688
176.525			0.0024911
200.294			0.0042467
224.344			0.0025649
248.195			0.0016725
272.032			0.0024491
296.061			0.0038571
320.11			0.047
344.133			0.0929
368.091			0.129
391.999			0.1555
415.909			0.1777
439.889			0.1907
463.652			0.2043
487.627			0.2143
511.731			0.2238
535.846			0.233
559.955			0.2351
583.887			0.2413
607.908			0.2421
631.86			0.2442
656.019			0.2483
680.04			0.2519
704.1			0.2519
728.055			0.2585
751.789			0.2558
775.694			0.2565
799.671			0.2573
823.519			0.2601
847.508			0.2646
871.36			0.2638
895.126			0.2637
918.867			0.2647
942.805			0.2645
966.577			0.2641
990.342			0.2647
1014.22			0.2676
1038.06			0.2682
1061.94			0.2678
1085.93			0.2745
1109.82			0.2729
1133.95			0.2693
1157.95			0.2672
1181.98			0.2682
1206.05			0.2713
1230.01			0.2708
1254.05			0.2687
1277.96			0.2722
1301.93			0.2763
1325.97			0.276
1349.91			0.2734
1373.87			0.2745
1397.87			0.2734
1421.91			0.2758
1445.99			0.2747
1470.01			0.274
1493.83			0.2759
14.0467				0
37.9251				-0.0031858
61.8202				-0.002524
85.5995				0.00045968
109.598				0.00034524
133.458				0.00025491
157.286				-0.00074257
181.05				-4.6159e-05
204.853				-0.0017618
228.868				-0.002155
252.885				-0.0011318
276.648				-0.0014127
300.616				0.00029306
324.753				0.031
348.667				0.0702
372.606				0.1006
396.617				0.1314
420.492				0.1528
444.445				0.1719
468.246				0.1831
492.33				0.1949
516.421				0.2021
540.568				0.2102
564.513				0.2143
588.488				0.2167
612.576				0.2199
636.56				0.2216
660.733				0.226
684.725				0.2294
708.736				0.2311
732.561				0.2345
756.377				0.2335
780.368				0.2347
804.318				0.2336
828.108				0.2354
852.076				0.2401
875.933				0.2411
899.66				0.2391
923.401				0.2411
947.388				0.2413
971.176				0.2398
994.96				0.2402
1018.82				0.2468
1042.58				0.2462
1066.62				0.245
1090.49				0.2487
1114.54				0.2474
1138.65				0.2452
1162.57				0.2441
1186.65				0.246
1210.68				0.2477
1234.63				0.2484
1258.64				0.2483
1282.67				0.2501
1306.65				0.2532
1330.64				0.2552
1354.49				0.2524
1378.47				0.2506
1402.49				0.2486
1426.55				0.2504
1450.54				0.2528
1474.65				0.2527
1498.43				0.2519
0.2754					0
24.4202					0.0016114
48.4297					0.00044462
72.2964					0.0015922
96.3679					0.0014963
120.143					0.00027547
144.05					0.00097127
168.117					0.0036514
192.299					0.0031434
216.448					0.0018539
240.423					0.0010811
264.244					0.00065911
288.192					0.0019725
312.022					0.0265
336.064					0.0543
359.869					0.0796
383.718					0.1029
407.572					0.1201
431.472					0.1355
455.413					0.1484
479.214					0.1577
502.922					0.1661
527.108					0.1755
551.239					0.1832
575.267					0.1896
599.019					0.1954
622.914					0.1987
646.683					0.2008
670.594					0.2032
694.405					0.2052
718.494					0.2078
742.447					0.2095
766.413					0.2145
790.4					0.2142
814.55					0.2168
838.446					0.2202
862.226					0.2226
886.099					0.223
910.245					0.2212
934.014					0.2211
957.935					0.2255
981.735					0.2262
1005.51					0.2257
1029.5					0.2269
1053.37					0.2276
1077.45					0.229
1101.45					0.2313
1125.49					0.2276
1149.27					0.2288
1173.28					0.2313
1197.24					0.2316
1221.25					0.2291
1245.17					0.2294
1269.13					0.2285
1293.15					0.2271
1317.03					0.2289
1340.98					0.2317
1364.87					0.2324
1389.11					0.2367
1413.17					0.235
1437.32					0.2361
1461.1					0.2326
1484.88					0.2318
4.9796						0
29.1194						0.00072226
53.0019						0.0015465
76.9256						0.0019044
100.921						0.0015991
124.664						0.00038653
148.722						0.00083588
172.798						0.0027443
196.964						0.0039969
221.04						0.0021233
245.019						0.0023031
268.805						0.0017314
292.838						0.0033536
316.713						0.0472
340.559						0.0903
364.416						0.129
388.297						0.1585
412.191						0.178
436.176						0.1936
459.991						0.2066
483.72						0.2143
507.607						0.2232
531.757						0.2282
555.923						0.2358
579.871						0.2385
603.594						0.2422
627.491						0.2428
651.314						0.2451
675.126						0.2464
699.087						0.246
723.101						0.2476
747.047						0.2499
771.113						0.251
795.053						0.2532
819.075						0.2548
843.036						0.2549
866.832						0.261
890.796						0.2581
914.821						0.256
938.654						0.2572
962.443						0.2582
986.326						0.2599
1010.11						0.2599
1034.13						0.2598
1058.11						0.2589
1081.96						0.2593
1106.03						0.2633
1130.09						0.2609
1153.95						0.2629
1177.93						0.2654
1201.95						0.2633
1225.92						0.2611
1249.78						0.2617
1273.88						0.2604
1297.69						0.2604
1321.61						0.2639
1345.56						0.2641
1369.62						0.2636
1393.68						0.2701
1417.77						0.267
1441.83						0.2675
1465.6						0.2666
1489.51						0.2638
9.7168							0
33.6825							0.0021366
57.6231							0.0022884
81.6368							0.0018144
105.479							0.0032615
129.292							0.0015711
153.275							0.0015254
177.442							0.0041621
201.724							0.0033156
225.652							0.0029787
249.582							0.0037856
273.438							0.003744
297.389							0.0027874
321.344							0.0024213
345.188							0.0069521
369.023							0.018
392.868							0.0239
416.856							0.028
440.691							0.0333
464.567							0.0389
488.32							0.042
512.321							0.0471
536.467							0.0505
560.484							0.056
584.405							0.0581
608.169							0.0602
631.993							0.062
655.971							0.0645
679.717							0.0676
703.811							0.0694
727.797							0.0699
751.712							0.0732
775.715							0.0747
799.715							0.0768
823.714							0.0798
847.579							0.0817
871.375							0.0857
895.426							0.0831
919.38							0.0835
943.312							0.0864
967.06							0.0889
990.91							0.0897
1014.82							0.0908
1038.76							0.0919
1062.73							0.0912
1086.65							0.0931
1110.71							0.0959
1134.66							0.0965
1158.51							0.098
1182.58							0.0986
1206.56							0.099
1230.44							0.1
1254.36							0.1005
1278.54							0.0999
1302.28							0.1008
1326.2							0.1047
1350.23							0.1048
1374.27							0.106
1398.4							0.1085
1422.48							0.1075
1446.42							0.1092
1470.17							0.1087
1494.03							0.109
14.276								0
38.3577								0.0014412
62.1693								-3.8798e-06
86.279								0.0015541
110.014								-0.00041028
133.944								0.0012
158.017								0.0011456
182.173								0.0029006
206.346								0.0031459
230.318								0.0015638
254.162								0.0016436
278.115								0.0019918
301.953								-0.0094563
326.009								-0.0017287
349.735								-0.0021021
373.575								0.003801
397.479								0.00054496
421.389								-0.00026958
445.278								-0.0016063
469.149								-0.00030837
492.825								-0.00095129
517.001								-0.0013737
541.102								0.00061846
565.137								0.00083897
588.91								0.00016114
612.815								0.0011126
636.617								-0.00041247
660.494								-0.00041859
684.277								-0.00039614
708.388								0.0001346
732.349								0.00035101
756.319								0.0011514
780.291								0.00039591
804.413								0.0013229
828.301								0.0004
852.109								0.004271
875.984								0.0039542
900.104								0.0032472
923.948								0.0018376
947.869								0.0032125
971.609								0.003143
995.465								0.0022849
1019.36								0.0036804
1043.27								0.0042404
1067.31								0.0030245
1091.3								0.0029182
1115.41								0.0050069
1139.15								0.0036845
1163.15								0.0040789
1187.17								0.0049149
1211.13								0.0060783
1235.1								0.0050969
1259.01								0.0035476
1283.06								0.0026404
1306.93								0.0038112
1330.88								0.0051889
1354.78								0.0046001
1378.97								0.0047984
1403.09								0.0067819
1427.16								0.0054751
1450.97								0.0061417
1474.79								0.0049926
1498.66								0.0049292

## Sheet: Fig. 5B
Fig. 5B
x: time (s)	y: Fluorescence (% of maximum)
	WT	K603E	K706E	K720E	R769E	K603E/K720E	K706E/R769E	K603E/K706E/K720E/R769E
2.0743	0
25.9037	-0.0082328
49.8482	-0.0015949
73.7131	-0.0018104
97.4583	-0.0043105
121.458	-0.00056038
145.363	-0.0042243
169.096	0.0035348
192.861	-0.0040518
216.787	-0.0041812
240.802	-0.0017673
264.733	-0.00030174
288.552	-0.0034053
312.517	0.0456
336.593	0.101
360.601	0.1565
384.523	0.2015
408.445	0.2458
432.299	0.2697
456.352	0.2784
480.06	0.3132
504.253	0.3397
528.309	0.3575
552.432	0.3805
576.377	0.3823
600.417	0.3921
624.395	0.4085
648.464	0.4135
672.613	0.4346
696.56	0.4267
720.595	0.4473
744.441	0.4468
768.306	0.437
792.253	0.4474
816.154	0.4593
840.04	0.4812
863.98	0.4917
887.789	0.4883
911.54	0.4833
935.284	0.4864
959.204	0.4707
983.027	0.4801
1006.88	0.4947
1030.68	0.4868
1054.42	0.5032
1078.52	0.5086
1102.45	0.5053
1126.49	0.5135
1150.5	0.5061
1174.39	0.4982
1198.55	0.4988
1222.55	0.4988
1246.57	0.5088
1270.56	0.5359
1294.5	0.5245
1318.54	0.5205
1342.53	0.5117
1366.39	0.5041
1390.42	0.5179
1414.38	0.5173
1438.48	0.5154
1462.5	0.5356
1486.5	0.531
6.6826		0
30.5378		-0.003699
54.4359		-3.9357e-05
78.3073		0.0016921
102.119		0.004014
126.029		0.0083824
149.99		0.0042107
173.634		0.0047617
197.535		0.0010625
221.488		0.0061391
245.319		0.0023218
269.274		-0.0020069
293.202		0.0031088
317.208		0.0421
341.288		0.1166
365.182		0.1849
389.125		0.251
413.069		0.2982
436.975		0.3326
460.92		0.3523
484.777		0.3704
508.875		0.4078
532.955		0.4029
557.055		0.4302
580.948		0.4197
605.079		0.4275
629.048		0.4372
653.113		0.4418
677.13		0.45
701.193		0.4563
725.252		0.4669
749.016		0.4574
772.833		0.4468
796.89		0.4475
820.779		0.4708
844.68		0.4658
868.481		0.4776
892.329		0.4842
916.09		0.4763
939.951		0.4724
963.823		0.4742
987.581		0.459
1011.47		0.4662
1035.24		0.4719
1059.11		0.4815
1083.16		0.5009
1107.07		0.4795
1131.12		0.4769
1155.16		0.4755
1179.05		0.476
1203.22		0.4798
1227.26		0.4812
1251.2		0.4826
1275.1		0.4859
1299.12		0.4921
1323.09		0.4781
1347.06		0.476
1371.06		0.4793
1395.03		0.4906
1419.07		0.4901
1443.17		0.4882
1467.09		0.496
1490.98		0.5086
11.2459			0
35.048			0.0013456
59.057			-0.0042859
82.8734			-0.0049835
106.738			4.9832e-05
130.686			0.0048841
154.518			0.0037378
178.274			-0.0049337
202.059			4.9832e-05
226.104			0.0035883
249.994			0.0005482
273.791			0.0055819
297.831			0.002442
321.882			0.0631
345.907			0.1458
369.842			0.232
393.775			0.3009
417.739			0.3655
441.702			0.3861
465.456			0.4242
489.447			0.4636
513.525			0.4805
537.662			0.5
561.707			0.5304
585.655			0.531
609.661			0.5472
633.639			0.5505
657.81			0.5784
681.842			0.5926
705.894			0.5944
729.812			0.5939
753.533			0.6037
777.488			0.5833
801.478			0.5909
825.266			0.6099
849.261			0.6119
873.133			0.6061
896.884			0.6161
920.639			0.619
944.556			0.6198
968.326			0.6096
992.168			0.6143
1015.97			0.6227
1039.83			0.6258
1063.7			0.6373
1087.71			0.645
1111.64			0.6327
1135.75			0.6148
1159.74			0.6092
1183.75			0.6312
1207.86			0.6261
1231.77			0.6281
1255.84			0.6533
1279.75			0.6483
1303.74			0.6331
1327.73			0.6429
1351.68			0.6392
1375.65			0.6366
1399.65			0.6381
1423.66			0.6476
1447.77			0.6562
1471.81			0.6397
1495.61			0.653
15.8098				0
39.7332				0.00035425
63.5952				-0.006275
87.3386				-0.0033906
111.364				-0.0029352
135.234				-0.0013664
159.024				0.002834
182.793				-0.00334
206.674				-0.001164
230.677				-0.00025304
254.681				-0.00070848
278.43				0.00167
302.426				-0.0079955
326.508				0.0266
350.477				0.098
374.412				0.1713
398.362				0.2279
422.247				0.2964
446.26				0.3252
469.995				0.37
494.127				0.4096
518.178				0.4341
542.319				0.4532
566.284				0.4728
590.262				0.4685
614.325				0.4854
638.349				0.4925
662.535				0.5117
686.477				0.5067
710.495				0.5321
734.348				0.5273
758.199				0.5272
782.165				0.5265
806.087				0.5358
829.887				0.5515
853.868				0.559
877.693				0.56
901.445				0.5505
925.191				0.5509
949.138				0.5493
972.948				0.5433
996.762				0.5486
1020.57				0.5423
1044.34				0.5645
1068.41				0.5778
1092.3				0.5774
1116.34				0.5652
1140.4				0.5605
1164.31				0.5357
1188.41				0.5531
1212.43				0.5612
1236.46				0.5785
1260.39				0.5717
1284.43				0.5739
1308.41				0.5908
1332.42				0.577
1356.25				0.5759
1380.29				0.5872
1404.23				0.59
1428.35				0.574
1452.36				0.5833
1476.4				0.5916
1500.22				0.5874
2.0715					0
26.2142					0.0010606
50.2318					0.0021654
74.0525					-0.00053028
98.131					0.0025631
121.918					0.001149
145.848					-0.0067608
169.914					0.0033585
194.104					0.00022095
218.184					0.0059659
242.164					-0.0014583
266.039					0.0059217
289.964					-0.0058329
313.79					0.0244
337.819					0.0537
361.657					0.0968
385.466					0.1327
409.319					0.1681
433.279					0.186
457.216					0.2261
480.965					0.2517
504.742					0.27
528.876					0.3011
553.013					0.3246
577.012					0.3409
600.748					0.3528
624.663					0.3606
648.471					0.3624
672.389					0.3759
696.219					0.3777
720.239					0.3989
744.252					0.3934
768.181					0.4083
792.136					0.4112
816.338					0.4188
840.172					0.4178
863.994					0.4279
887.878					0.4088
911.988					0.4149
935.765					0.4341
959.715					0.4307
983.461					0.4383
1007.24					0.4376
1031.26					0.4463
1055.18					0.4326
1079.24					0.4236
1103.19					0.4309
1127.28					0.4429
1151.07					0.4552
1175.06					0.4505
1199.05					0.4488
1223.06					0.4574
1246.91					0.4537
1270.94					0.4497
1294.91					0.4404
1318.83					0.4595
1342.78					0.4516
1366.67					0.4681
1390.85					0.4739
1414.93					0.468
1439.04					0.4648
1462.87					0.4572
1486.68					0.4489
6.8007						0
30.9464						-0.0053582
54.757						-0.0077531
78.7197						-0.0011366
102.715						-0.0039375
126.431						-0.0066571
150.491						-0.0017861
174.605						-0.003288
198.788						0.0035724
222.808						-0.0022732
246.8						-0.0079966
270.628						-0.0060483
294.643						-0.0094578
318.465						0.0369
342.36						0.104
366.178						0.1891
390.047						0.2475
413.99						0.2932
437.926						0.3322
461.753						0.3668
485.507						0.3723
509.414						0.406
533.58						0.4327
557.727						0.4562
581.617						0.4556
605.366						0.4714
629.24						0.4676
653.115						0.4754
676.947						0.4704
700.906						0.4649
724.896						0.4835
748.852						0.4895
772.858						0.4939
796.823						0.4935
820.844						0.5086
844.826						0.5081
868.594						0.4936
892.564						0.4904
916.593						0.5009
940.461						0.5143
964.198						0.5051
988.1						0.512
1011.91						0.5133
1035.92						0.5088
1059.86						0.5175
1083.73						0.5191
1107.83						0.5127
1131.85						0.5174
1155.7						0.5139
1179.74						0.5297
1203.71						0.5165
1227.69						0.5222
1251.57						0.5197
1275.66						0.5114
1299.49						0.525
1323.37						0.5499
1347.38						0.5328
1371.38						0.5252
1395.46						0.5437
1419.55						0.5311
1443.64						0.5376
1467.41						0.5336
1491.27						0.526
11.4859							0
35.4636							0.00095305
59.3632							0.0017556
83.4298							-0.0005016
107.249							-0.0049156
131.066							-0.001555
155.097							-5.0152e-05
179.272							0.0048155
203.493							-0.00030097
227.447							-0.0034108
251.386							-0.00075239
275.258							-0.0052667
299.202							-0.0056679
323.167							-0.0010187
346.947							-0.0020218
370.766							0.0092767
394.611							0.0035217
418.618							0.0059504
442.457							0.0155
466.354							0.0227
490.06							0.0209
514.092							0.0215
538.292							0.031
562.308							0.0477
586.166							0.0525
609.991							0.049
633.75							0.0493
657.745							0.0523
681.516							0.059
705.612							0.0583
729.538							0.0687
753.48							0.0683
777.496							0.0725
801.527							0.0744
825.462							0.0819
849.332							0.083
873.126							0.0949
897.215							0.0785
921.161							0.0917
945.076							0.0917
968.844							0.089
992.653							0.0947
1016.57							0.0931
1040.52							0.0945
1064.5							0.0941
1088.42							0.0913
1112.51							0.1083
1136.4							0.1071
1160.27							0.097
1184.35							0.1061
1208.34							0.1118
1232.2							0.1115
1256.16							0.1089
1280.3							0.1037
1304.09							0.114
1327.99							0.1245
1352.02							0.1176
1376.06							0.1224
1400.19							0.1236
1424.28							0.1177
1448.17							0.1304
1471.92							0.1086
1495.85							0.1169
16.0741								0
40.1098								-0.0038006
63.9414								-0.00078095
88.049								0.00052065
111.799								0.0045818
135.742								-0.01
159.825								-0.00057269
183.98								-0.0021867
208.1								-0.0053625
232.081								0.003228
255.926								-0.0069243
279.877								-0.0039047
303.716								-0.0225
327.767								-0.0113
351.535								-0.0086612
375.391								-0.004168
399.246								-0.0103
423.152								-0.0034557
447.069								-0.0062503
470.9								-0.0125
494.608								-0.0147
518.787								-0.01
542.89								-0.0086612
566.928								-0.0034557
590.705								-0.0067982
614.588								-0.0078941
638.369								-0.0102
662.295								-0.0139
686.046								-0.0123
710.148								-0.0111
734.131								-0.0086612
758.102								-0.0082228
782.094								-0.0113
806.208								-0.0111
830.11								-0.0079489
853.889								-0.0036749
877.783								-0.0067982
901.896								-0.0071817
925.709								-0.0105
949.616								-0.003894
973.404								-0.0058667
997.204								-0.0129
1021.15								-0.0028529
1045.04								-0.0079489
1069.11								-0.004716
1093.12								-0.0099214
1117.15								-0.0024693
1140.93								-0.0094283
1164.94								-0.011
1188.93								-0.0065242
1212.92								-0.0052091
1236.84								-0.0042228
1260.78								-0.006579
1284.83								-0.0079489
1308.72								-0.0089899
1332.68								-0.0062503
1356.54								0.0015857
1380.79								-0.009757
1404.84								-0.0023049
1428.98								-0.0040036
1452.76								-0.0024693
1476.57								-0.0058119
1500.42								-0.0128

## Sheet: Fig. 5C
Fig. 5C
x: time (s)	y: Fluorescence (% of maximum)
	WT	K603E	K706E	K720E	R769E	K603E/K720E	K706E/R769E	K603E/K706E/K720E/R769E
0.2737	0
24.2876	0.0238
48.2933	0.0437
72.455	0.0568
96.2772	0.0652
120.241	0.0737
144.151	0.0826
168.141	0.0891
192.019	0.0919
215.962	0.0969
240.047	0.1011
264.006	0.1081
288.091	0.1106
345.724	0.1744
369.529	0.2014
393.514	0.2157
417.496	0.2243
441.449	0.2297
465.356	0.2357
489.334	0.2377
513.27	0.2373
537.283	0.2415
561.164	0.2416
584.994	0.2409
608.922	0.2424
633.006	0.2445
656.874	0.2467
680.851	0.249
704.814	0.2493
728.901	0.2481
752.703	0.25
776.655	0.2502
800.526	0.2473
824.663	0.2501
848.729	0.2506
872.561	0.2509
896.67	0.2499
920.52	0.2504
944.394	0.2502
968.446	0.2495
992.378	0.2529
1016.49	0.2561
1040.6	0.2531
1064.58	0.2518
1088.46	0.2535
1112.54	0.2531
1136.73	0.2552
1160.56	0.2554
1184.58	0.2522
1208.47	0.254
1232.36	0.2569
1256.34	0.256
1280.21	0.2531
1304.19	0.2537
1328.18	0.2526
1352.16	0.2564
1376.16	0.2544
1399.98	0.2553
1423.91	0.2561
1447.8	0.255
1471.85	0.2557
1495.86	0.2575
4.8629		0
28.8418		0.0014601
52.9885		0.0058278
77.0182		0.0074856
100.819		0.0091135
124.883		0.0109
148.75		0.0129
172.745		0.0134
196.547		0.0124
220.51		0.0135
244.573		0.0169
268.635		0.0172
292.716		0.0171
350.326		0.2004
374.147		0.2136
398.159		0.2411
422.033		0.2566
445.995		0.2641
469.884		0.2667
493.947		0.2668
517.913		0.2677
541.866		0.2704
565.788		0.2675
589.634		0.2683
613.52		0.2677
637.613		0.2704
661.607		0.272
685.453		0.274
709.437		0.2733
733.44		0.2735
757.334		0.2744
781.271		0.2748
805.191		0.2723
829.306		0.2736
853.312		0.2755
877.188		0.2751
901.315		0.276
925.024		0.2738
949.063		0.2735
973.111		0.2753
997.001		0.28
1021.1		0.2792
1045.26		0.2789
1069.16		0.2766
1093.09		0.2763
1117.29		0.2781
1141.3		0.2784
1165.23		0.2785
1189.17		0.2739
1213.08		0.2749
1236.99		0.2759
1260.83		0.2785
1284.8		0.2764
1308.81		0.2768
1332.76		0.2757
1356.73		0.2779
1380.75		0.2774
1404.61		0.279
1428.47		0.2784
1452.47		0.2794
1476.53		0.278
1500.51		0.2776
9.4421			0
33.5219			0.0214
57.6766			0.039
81.6464			0.0505
105.436			0.0588
129.528			0.0651
153.291			0.0711
177.336			0.075
201.148			0.0771
225.218			0.0802
249.184			0.0868
273.368			0.0875
297.411			0.088
354.89			0.1938
378.759			0.2241
402.862			0.2382
426.573			0.2467
450.709			0.2504
474.601			0.2545
498.466			0.2543
522.585			0.2563
546.542			0.2592
570.341			0.2559
594.263			0.2576
618.239			0.2592
642.162			0.261
666.254			0.2617
690.007			0.2633
714.09			0.2628
738.054			0.2617
761.923			0.2629
785.787			0.2627
809.839			0.2633
833.912			0.2633
857.866			0.2663
881.869			0.2624
905.842			0.2631
929.658			0.2645
953.62			0.2635
977.699			0.2628
1001.69			0.2717
1025.79			0.2674
1049.87			0.2678
1073.77			0.265
1097.76			0.2657
1121.93			0.2651
1145.93			0.2686
1169.77			0.2675
1193.81			0.2655
1217.71			0.2649
1241.52			0.2645
1265.5			0.2662
1289.4			0.2653
1313.37			0.2634
1337.41			0.2636
1361.28			0.2658
1385.29			0.2675
1409.23			0.2676
1433.18			0.2665
1456.99			0.2681
1481.2			0.2671
1505.16			0.2666
14.1433				0
38.1721				0.0105
62.3189				0.0217
86.1666				0.0288
110.113				0.0337
134.056				0.038
158.022				0.0427
181.935				0.043
205.843				0.0467
229.86				0.0471
253.928				0.0536
278.017				0.0545
302.096				0.055
359.43				0.2333
383.361				0.2386
407.375				0.251
431.296				0.2572
455.269				0.258
479.225				0.2588
503.125				0.2601
527.177				0.2582
551.05				0.2596
574.85				0.2589
598.832				0.2589
622.866				0.2601
646.73				0.2607
670.76				0.2608
694.652				0.2635
718.824				0.2611
742.615				0.2624
766.5				0.2635
790.439				0.2619
814.566				0.2633
838.604				0.265
862.461				0.2628
886.547				0.2644
910.393				0.2622
934.292				0.2615
958.312				0.2652
982.268				0.2641
1006.4				0.268
1030.47				0.2685
1054.41				0.265
1078.3				0.2644
1102.46				0.2644
1126.57				0.2652
1150.44				0.2659
1174.47				0.265
1198.37				0.2639
1222.22				0.2666
1246.16				0.266
1270.1				0.2645
1294.07				0.2657
1318.01				0.2638
1342.01				0.2635
1365.98				0.2649
1389.87				0.2645
1413.79				0.2664
1437.69				0.2658
1461.71				0.2658
1485.72				0.2668
1509.87				0.2648
0.2864					0
24.2798					0.0044931
48.1507					0.008243
72.1795					0.0096422
96.2702					0.0106
120.337					0.0127
144.279					0.0137
168.291					0.0137
192.277					0.0141
216.262					0.0152
240.39					0.017
264.547					0.0173
288.491					0.0172
345.675					0.1578
369.72					0.1985
393.772					0.2331
417.739					0.2459
441.762					0.2501
465.509					0.2517
489.206					0.2542
512.843					0.2554
536.649					0.2582
560.532					0.2579
584.526					0.2609
608.533					0.2625
632.541					0.2621
656.423					0.2631
680.129					0.2634
703.818					0.2615
727.556					0.2617
751.499					0.2628
775.444					0.2634
799.168					0.2624
823.21					0.263
847.111					0.2623
871.187					0.2623
895.166					0.2636
919.014					0.2662
942.764					0.2653
966.737					0.2646
990.634					0.2629
1014.34					0.262
1038.23					0.2639
1062.21					0.2632
1086.09					0.2662
1109.77					0.2649
1133.81					0.2635
1157.94					0.2646
1182.04					0.263
1206.03					0.264
1230					0.2643
1253.98					0.2648
1278					0.2652
1301.82					0.2629
1325.56					0.2647
1349.46					0.2645
1373.39					0.2614
1397.26					0.2634
1421.33					0.2648
1445.28					0.2658
1469.25					0.2666
1493.19					0.2655
4.9795						0
28.843						0.0039874
52.7809						0.0060143
76.8187						0.0072655
100.933						0.0078555
124.909						0.0087312
148.876						0.0087341
172.952						0.0088278
196.872						0.0091516
220.946						0.0105
245.075						0.0114
269.232						0.0097918
293.153						0.0127
350.333						0.2297
374.338						0.237
398.436						0.2369
422.438						0.257
446.377						0.2615
470.028						0.2627
493.757						0.2644
517.389						0.2661
541.229						0.2696
565.224						0.2715
589.211						0.2705
613.178						0.2714
637.142						0.2735
660.974						0.273
684.735						0.2726
708.334						0.2723
732.236						0.2735
756.207						0.2729
780.052						0.2733
803.799						0.2726
827.754						0.2739
851.756						0.2726
875.843						0.2716
899.743						0.2738
923.612						0.275
947.37						0.2751
971.294						0.2728
995.195						0.2739
1018.94						0.2734
1042.9						0.2752
1066.77						0.2759
1090.58						0.2754
1114.4						0.2755
1138.56						0.2744
1162.64						0.274
1186.57						0.2743
1210.66						0.2736
1234.63						0.2752
1258.63						0.276
1282.64						0.2754
1306.41						0.2769
1330.18						0.2762
1354.17						0.2746
1377.9						0.2723
1401.91						0.2752
1425.97						0.2766
1449.89						0.2754
1473.93						0.275
1497.85						0.2756
9.5157							0
33.4542							0.0035342
57.4961							0.0060899
81.5139							0.0082076
105.644							0.0072699
129.554							0.0076732
153.509							0.0094444
177.512							0.0097904
201.522							0.0107
225.655							0.0105
249.727							0.0124
273.815							0.0136
297.824							0.0135
354.976							0.0949
379.041							0.1403
403.086							0.1892
427.092							0.2128
450.904							0.2198
474.556							0.2239
498.249							0.2251
521.92							0.2278
545.779							0.2321
569.871							0.2352
593.883							0.234
617.78							0.2358
641.707							0.2388
665.516							0.2378
689.253							0.2362
712.908							0.2397
736.866							0.2405
760.795							0.24
784.577							0.2409
808.472							0.2406
832.346							0.2417
856.402							0.24
880.489							0.2395
904.348							0.2431
928.17							0.2437
952.1							0.2428
975.881							0.2431
999.747							0.2404
1023.48							0.2421
1047.55							0.2455
1071.38							0.2451
1095.16							0.246
1119.11							0.2455
1143.12							0.243
1167.29							0.242
1191.21							0.239
1215.29							0.2419
1239.33							0.2429
1263.35							0.2441
1287.16							0.2433
1310.97							0.2458
1334.88							0.2438
1358.81							0.2457
1382.6							0.2407
1406.59							0.2433
1430.61							0.2434
1454.62							0.2436
1478.57							0.2442
1502.35							0.2444
14.1859								0
38.0744								0.0033672
62.0953								0.0026889
86.1591								0.0043042
110.25								0.0050227
134.201								0.0054932
158.204								0.0045298
182.193								0.0051598
206.189								0.0063162
230.365								0.0060714
254.435								0.0068303
278.451								0.0079803
302.543								0.0081194
359.601								0.0087766
383.64								0.0132
407.687								0.0204
431.66								0.0269
455.477								0.0322
479.179								0.0368
502.813								0.0427
526.601								0.0481
550.452								0.0535
574.443								0.0584
598.43								0.0624
622.495								0.0657
646.364								0.0697
670.059								0.0731
693.783								0.0758
717.463								0.0787
741.399								0.0821
765.383								0.0836
789.114								0.0863
813.153								0.0885
837.068								0.0911
861.096								0.0928
885.032								0.0938
908.986								0.0985
932.732								0.0985
956.693								0.1014
980.549								0.1008
1004.3								0.1026
1028.11								0.1052
1052.14								0.1085
1076.05								0.109
1099.72								0.1106
1123.74								0.1117
1147.83								0.1121
1171.98								0.1124
1195.92								0.1137
1219.94								0.1158
1243.95								0.1187
1267.94								0.1189
1291.74								0.1193
1315.5								0.1211
1339.39								0.1221
1363.34								0.1223
1387.22								0.1209
1411.28								0.1237
1435.24								0.1242
1459.18								0.126
1483.16								0.1271
1507.04								0.1275

## Sheet: Fig. 5D
Fig. 5D
x: time (s)	y: Fluorescence (% of maximum)
	WT	K603E	K706E	K720E	R769E	K603E/K720E	K706E/R769E	K603E/K706E/K720E/R769E
2.0558	0
26.0667	0.0322
50.0954	0.0656
74.2741	0.0804
98.0393	0.0928
121.998	0.1294
145.955	0.1298
169.913	0.1515
193.768	0.1566
217.701	0.1647
241.807	0.1731
265.759	0.2026
289.838	0.2086
347.469	0.4103
371.279	0.4972
395.282	0.5317
419.231	0.5842
443.232	0.6062
467.1	0.602
491.094	0.6172
515.018	0.6135
539.065	0.6116
562.957	0.6093
586.762	0.5932
610.681	0.5923
634.776	0.6177
658.667	0.6293
682.594	0.617
706.557	0.6225
730.663	0.6268
754.49	0.6152
778.462	0.6047
802.288	0.6115
826.465	0.6185
850.466	0.6096
874.321	0.6231
898.447	0.6172
922.261	0.5975
946.184	0.607
970.187	0.6099
994.13	0.6149
1018.25	0.6192
1042.36	0.6314
1066.31	0.6202
1090.27	0.6282
1114.34	0.6182
1138.53	0.5921
1162.36	0.5952
1186.31	0.6031
1210.25	0.6204
1234.15	0.6135
1258.08	0.621
1281.96	0.6066
1305.96	0.5958
1329.96	0.5996
1353.9	0.615
1377.9	0.6214
1401.75	0.6191
1425.67	0.6297
1449.57	0.6195
1473.62	0.6124
1497.65	0.6092
6.618		0.0081874
30.6129		0.0103
54.8146		0.0119
78.8363		0.0087922
102.611		0
126.681		0.0031632
150.506		0.0018142
174.502		0.01
198.341		0.0109
222.305		0.0098157
246.363		0.0173
270.457		0.015
294.518		0.0134
352.081		0.4465
375.943		0.463
399.958		0.5404
423.787		0.5761
447.818		0.5828
471.702		0.5871
495.708		0.58
519.723		0.5605
543.693		0.5678
567.555		0.551
591.429		0.5658
615.335		0.561
639.403		0.556
663.405		0.5617
687.22		0.56
711.224		0.5671
735.232		0.5634
759.086		0.5502
783.031		0.5562
806.969		0.5637
831.078		0.5688
855.068		0.5663
879.002		0.5718
903.071		0.5591
926.848		0.5676
950.818		0.5528
974.925		0.563
998.778		0.577
1022.89		0.5762
1047.08		0.562
1070.91		0.5623
1094.9		0.5679
1119.06		0.5676
1143.06		0.5644
1167		0.5551
1190.96		0.5596
1214.83		0.5615
1238.77		0.564
1262.62		0.5512
1286.58		0.5534
1310.61		0.5418
1334.56		0.537
1358.51		0.5635
1382.51		0.5592
1406.42		0.5726
1430.27		0.5695
1454.21		0.5751
1478.35		0.5541
1502.33		0.5701
11.2382			0
35.2713			0.0153
59.4357			0.0321
83.4044			0.0484
107.257			0.0631
131.298			0.0663
155.12			0.0831
179.111			0.0775
202.954			0.0934
227.017			0.0985
251.006			0.1034
275.192			0.1098
299.228			0.1097
356.641			0.438
380.528			0.5196
404.608			0.5694
428.393			0.5873
452.464			0.6047
476.352			0.6056
500.226			0.6024
524.344			0.6146
548.294			0.5932
572.093			0.5837
596.072			0.5749
620.004			0.6053
643.932			0.5944
668.021			0.5911
691.812			0.596
715.884			0.5955
739.797			0.5965
763.682			0.5966
787.569			0.5917
811.651			0.5968
835.715			0.5934
859.621			0.6128
883.685			0.6104
907.602			0.57
931.441			0.58
955.402			0.5882
979.499			0.5968
1003.49			0.6171
1027.61			0.6058
1051.63			0.603
1075.54			0.5917
1099.56			0.5826
1123.72			0.5873
1147.71			0.6042
1171.59			0.5892
1195.55			0.5941
1219.49			0.5868
1243.34			0.5934
1267.32			0.5754
1291.23			0.5808
1315.13			0.5596
1339.2			0.5835
1363.11			0.5995
1387.03			0.5929
1410.99			0.5987
1434.92			0.5945
1458.82			0.5811
1482.97			0.5886
1506.98			0.5975
15.9564				0.0050098
39.9222				0
64.0979				0.0039837
87.9256				0.0068206
111.883				0.0085711
135.803				0.0178
159.804				0.0297
183.682				0.0286
207.603				0.031
231.682				0.0331
255.67				0.0453
279.77				0.0395
303.87				0.0411
361.188				0.5474
385.173				0.5619
409.159				0.5769
433.091				0.5946
457.027				0.5921
480.986				0.5988
504.924				0.5828
528.932				0.5741
552.82				0.5669
576.633				0.5626
600.59				0.5704
624.652				0.5702
648.526				0.5743
672.51				0.5714
696.461				0.5748
720.567				0.5821
744.365				0.5623
768.309				0.5671
792.193				0.5716
816.315				0.5799
840.364				0.5677
864.222				0.5557
888.333				0.5764
912.171				0.5769
936.051				0.5552
960.072				0.5459
984.045				0.5569
1008.14				0.58
1032.27				0.5817
1056.22				0.5622
1080.12				0.5638
1104.21				0.5652
1128.37				0.572
1152.21				0.5713
1176.24				0.5579
1200.14				0.5597
1224.02				0.5781
1247.99				0.567
1271.87				0.5604
1295.85				0.5698
1319.83				0.547
1343.82				0.541
1367.8				0.572
1391.65				0.5664
1415.57				0.563
1439.45				0.5716
1463.5				0.5565
1487.52				0.5511
1511.66				0.563
2.1104					0.00055309
26.0209					0.0032683
49.9178					0.0040226
73.9216					0
98.0593					0.0159
122.103					0.0065368
146.05					0.0052294
170.03					0.0069894
194.016					0.0080957
218.062					0.0043746
242.153					0.0058831
266.358					0.0032181
290.24					0.0116
347.429					0.3956
371.48					0.4844
395.577					0.565
419.562					0.5735
443.544					0.5795
467.251					0.5763
490.947					0.5709
514.591					0.59
538.428					0.586
562.338					0.5942
586.332					0.5871
610.331					0.5854
634.288					0.6001
658.185					0.5852
681.914					0.5754
705.56					0.591
729.305					0.5829
753.271					0.5853
777.23					0.587
800.928					0.5755
824.968					0.5841
848.895					0.5771
872.933					0.573
896.973					0.5898
920.759					0.5833
944.585					0.5874
968.538					0.577
992.424					0.5605
1016.16					0.5736
1040.01					0.5807
1063.98					0.5895
1087.83					0.5832
1111.51					0.5824
1135.63					0.5609
1159.73					0.5748
1183.83					0.5483
1207.77					0.557
1231.75					0.5755
1255.72					0.5839
1279.78					0.5799
1303.56					0.5787
1327.32					0.5752
1351.29					0.5714
1375.16					0.5571
1399.06					0.5581
1423.14					0.57
1447.02					0.5763
1471.06					0.57
1494.99					0.5821
6.7566						0.0029784
30.5901						0.0080978
54.588						0.0073531
78.6259						0.0031645
102.736						0.0045607
126.705						0.0038626
150.644						0
174.695						0.0030249
198.647						0.0040488
222.756						0.0040022
246.845						0.0062827
271.006						0.0095406
294.937						0.0093078
352.084						0.527
376.125						0.5389
400.23						0.5191
424.24						0.5603
448.131						0.5612
471.813						0.5515
495.491						0.5661
519.135						0.5677
542.986						0.5808
567.052						0.5808
591.022						0.585
614.947						0.5737
638.926						0.5794
662.763						0.5704
686.49						0.5734
710.114						0.577
734.03						0.562
758.031						0.5734
781.816						0.5695
805.59						0.5669
829.533						0.566
853.55						0.5522
877.662						0.5567
901.496						0.5842
925.383						0.564
949.167						0.5578
973.038						0.5479
996.958						0.5512
1020.74						0.5529
1044.67						0.5678
1068.54						0.568
1092.41						0.5588
1116.2						0.5545
1140.33						0.5537
1164.41						0.5449
1188.39						0.5561
1212.42						0.557
1236.42						0.5613
1260.44						0.5608
1284.39						0.5662
1308.18						0.5688
1331.98						0.5659
1355.97						0.5521
1379.67						0.5588
1403.68						0.5539
1427.75						0.5597
1451.71						0.57
1475.72						0.5696
1499.61						0.5703
11.311							0.0061748
35.2063							0.0103
59.2482							0.0034047
83.2911							0.0028276
107.415							0.0068673
131.316							0.0085409
155.326							0
179.273							0.0064056
203.34							0.0115
227.48							0.0077329
251.515							0.0163
275.615							0.0090026
299.631							0.0101
356.734							0.1869
380.843							0.3307
404.838							0.4459
428.841							0.5002
452.687							0.4985
476.356							0.5117
500.041							0.5259
523.751							0.52
547.591							0.5325
571.643							0.5554
595.642							0.543
619.57							0.5558
643.514							0.5371
667.291							0.54
691.019							0.5447
714.66							0.5453
738.632							0.5634
762.569							0.5472
786.352							0.5507
810.274							0.5529
834.125							0.5378
858.219							0.5471
882.24							0.5633
906.094							0.576
929.967							0.566
953.933							0.5518
977.663							0.5449
1001.55							0.5532
1025.25							0.5686
1049.32							0.5756
1073.14							0.5594
1096.97							0.5674
1120.87							0.5466
1144.94							0.5499
1169.06							0.5549
1192.98							0.5469
1217.08							0.5431
1241.08							0.5661
1265.1							0.5813
1288.94							0.5591
1312.76							0.5687
1336.63							0.5778
1360.58							0.557
1384.4							0.5608
1408.39							0.5612
1432.36							0.5626
1456.43							0.5749
1480.34							0.5727
1504.16							0.5648
15.956								0.0189
39.8535								0.0196
63.8783								0.0104
87.9362								0.0080668
112.039								0.011
135.979								0.0049231
159.992								0.0080075
183.993								0
207.947								0.0093125
232.109								0.0091939
256.251								0.0080075
280.22								0.0076516
304.314								0.0134
361.422								0.0047602
385.403								0.0113
409.46								0.0191
433.482								0.0241
457.234								0.0261
480.921								0.0347
504.575								0.0425
528.357								0.0498
552.236								0.0566
576.231								0.0499
600.244								0.0665
624.263								0.0663
648.136								0.0717
671.854								0.0729
695.534								0.0824
719.252								0.0838
743.193								0.0932
767.135								0.0958
790.856								0.0889
814.923								0.0979
838.822								0.0878
862.911								0.1114
886.849								0.1021
910.726								0.1072
934.48								0.1134
958.441								0.113
982.36								0.1106
1006.05								0.1192
1029.93								0.1171
1053.92								0.1228
1077.8								0.1188
1101.49								0.1276
1125.54								0.1268
1149.65								0.1234
1173.77								0.1317
1197.73								0.1394
1221.7								0.1386
1245.69								0.1353
1269.72								0.1399
1293.53								0.1528
1317.26								0.1521
1341.17								0.1461
1365.11								0.1456
1388.98								0.1353
1413.04								0.1485
1437								0.1498
1460.97								0.1523
1484.92								0.1597
1508.83								0.1629

## Sheet: Fig. 5E
Fig. 5E
	y: Fluorescence (% of maximum) at 700 s
	AVG.	StDev																									2nd	3rd	avg.
WT	0.4118	0.013
K603E	0.4935	0.0332
K706E	0.5395	0.0517
K720E	0.5401	0.0077205
R769E	0.3706	0.0064349
K603E/K720E	0.4932	0.0402
K706E/R769E	0.0506	0.0262
K603E/K706E/K720E/R769E	-0.0074243	0.0031934

## Sheet: Fig. 5F
Fig. 5F
	y: Fluorescence (% of maximum) at 300 s
	AVG.	StDev																									2nd	3rd	avg.
WT	0.1025	0.0080235
K603E	0.015	0.001786
K706E	0.0763	0.0103
K720E	0.0518	0.0047143
R769E	0.0145	0.0026007
K603E/K720E	0.0117	0.0022025
K706E/R769E	0.0125	0.0017306
K603E/K706E/K720E/R769E	0.0077456	0.0010186
