# Supplementary material for: Control of neurotransmitter release by two distinct membrane-binding faces of the Munc13-1 C1C2B region
Source: eLife journal article supplement (doi:10.7554/elife.72030), 2021-11-15
Supplement: supp [file elife-72030-supp-v1.zip › elife_poa_e72030_Figure_6_figure_supplement_1_source_data_1.xlsx]

## Sheet: Summary table Figure 6S1
	Summary table Figure 6-Figure supplement 1. Values and statistics corresponding to Figure 6-Figure supplement 1
	Figure 6B	N°animals	N°cultures	N° cells		Parametric distribution	mean ± SEM	p-value	Statistical
	Munc13-1 Fluorescence intensity (a.u)		(N)	(n)	N° VGLUT-1 puncta per cell	(Kolmogorov-Smirnov test)			test
	Munc13-1 WT	2	2	12	50	No	9.805	>0.9999	Kruskall
									Wallis
	Munc13-1 K603E	2	2	12	50	Yes	10.65	>0.9999	Kruskall
									Wallis
	Munc13-1 K720E	2	2	12	50	Yes	9.873	>0.9999	Kruskall
									Wallis
	Munc13-1 K706E	2	2	12	50	Yes	10.11	>0.9999	Kruskall
									Wallis
	Munc13-1 R769E	2	2	12	50	Yes	9.548	>0.9999	Kruskall
									Wallis
	Munc13-1 K706E/R769E	2	2	12	50	Yes	9.678	>0.9999	Kruskall
									Wallis
	Munc13-1 K603E/K720E	2	2	12	50	Yes	10.71	>0.9999	Kruskall
									Wallis
	Munc13-1 K603E/K720E	2	2	12	50	No	10.51	>0.9999	Kruskall
	K706E/R769E								Wallis
