# Supplementary material for: Control of neurotransmitter release by two distinct membrane-binding faces of the Munc13-1 C1C2B region
Source: eLife journal article supplement (doi:10.7554/elife.72030), 2021-11-15
Supplement: supp [file elife-72030-supp-v1.zip › elife_poa_e72030_Figure_6_figure_supplement_2_source_data_1.xlsx]

## Sheet: Figure 6S2
	Summary table Figure 6-Figure supplement 2. Values and statistics corresponding to Figure 6-Figure supplement 2
	Figure 6-Figure supplement 2A mEPSC Frequency		N°animals	N°cultures (N)	N° cells	Parametric distribution	Normalized	p-value	Statistical
					(n)	(Kolmogorov-Smirnov test)	mean ± SEM		test
	Munc13-1 WT		5	5	58	No	1.00 ± 0.09	p < 0.05	Mann-Whitney
	Munc13-1 K603E		5	5	53		0.77 ± 0.09
	Munc13-1 WT		5	5	58	No	1.00 ± 0.09	p < 0.01	Mann-Whitney
	Munc13-1 K720E		5	5	62		1.57 ± 0.14
	Munc13-1 WT		4	4	48	No	1.00 ± 0.09	p = 0.21	Mann-Whitney
	Munc13-1 K706E		4	4	45		0.99 ± 0.14
	Munc13-1 WT		4	4	48	No	1.00 ± 0.09	p < 0.05	Mann-Whitney
	Munc13-1 R769E		4	4	37		0.75 ± 0.10
	Figure 6-Figure supplement 2B		N°animals	N°cultures	N° cells	Parametric distribution	Normalized	p-value	Statistical
	mEPSC Frequency			(N)	(n)	(Kolmogorov-Smirnov test)	mean ± SEM		test
	Munc13-1 WT		5	5	58	No	1.00 ± 0.09	p < 0.05	Mann-Whitney
	Munc13-1 K603E/K720E		5	5	53		0.73 ± 0.08
	Munc13-1 WT		6	6	70	No	1.00 ± 0.08	p < 0.001	Mann-Whitney
	Munc13-1 K706E/R769E		6	6	46		0.62 ± 0.09
	Munc13-1 WT		5	5	52	No	1.00 ± 0.10	p < 0.001	Mann- Whitney
	Munc13-1 K603E/K720E		5	5	27		0.50 ± 0.08
	K706E/R769E
