# Supplementary material for: Control of neurotransmitter release by two distinct membrane-binding faces of the Munc13-1 C1C2B region
Source: eLife journal article supplement (doi:10.7554/elife.72030), 2021-11-15
Supplement: supp [file elife-72030-supp-v1.zip › elife_poa_e72030_Figure_6_source_data_1.xlsx]

## Sheet: Figure 6
	Summary table Figure 6. Values and statistics corresponding to Figure 6
	Figure 6A		N°animals	N°cultures (N)	N° cells (n)	Parametric distribution	Normalized	p-value	Statistical
	Sucrose charge					(Kolmogorov-Smirnov test)	mean ± SEM		test
	Munc13-1 WT		5	5	69	No	1.00 ± 0.12	p < 0.001	Mann-Whitney
	Munc13-1 K603E		5	5	68		0.39 ± 0.05
	Munc13-1 WT		5	5	69	No	1.00 ± 0.12	p = 0.83	Mann-Whitney
	Munc13-1 K720E		5	5	70		1.16 ± 0.15
	Munc13-1 WT		4	4	54	No	1.00 ± 0.11	p = 0.50	Mann- Whitney
	Munc13-1 K706E		4	4	48		0.94 ± 0.13
	Munc13-1 WT		4	4	54	No	1.00 ± 0.11	p < 0.001	Mann-Whitney
	Munc13-1 R769E		4	4	51		0.34 ± 0.04
	Figure 6B		N°animals	N°cultures (N)	N° cells (n)	Parametric distribution	Normalized	p-value	Statistical
	EPSC Amplitude					(Kolmogorov-Smirnov test)	mean ± SEM		test
	Munc13-1 WT		5	5	73	No	1.00 ± 0.10	p < 0.001	Mann-Whitney
	Munc13-1 K603E		5	5	70		0.50 ± 0.08
	Munc13-1 WT		5	5	73	No	1.00 ± 0.10	p < 0.01	Mann-Whitney
	Munc13-1 K720E		5	5	72		0.63 ± 0.08
	Munc13-1 WT		4	4	56	No	1.00 ± 0.11	p < 0.05	Mann-Whitney
	Munc13-1 K706E		4	4	53		0.94 ± 0.13
	Munc13-1 WT		4	4	56	No	1.00 ± 0.11	p < 0.001	Mann-Whitney
	Munc13-1 R769E		4	4	51		0.41 ± 0.05
	Figure 6C		N°animals	N°cultures (N)	N° cells (n)	Parametric distribution	mean ± SEM	p-value	Statistical
	Vesicular release probability (%)					(Kolmogorov-Smirnov test)			test
	Munc13-1 WT		5	5	69	No	8.55 ± 0.78	p = 0.60	Mann-Whitney
	Munc13-1 K603E		5	5	68		8.94 ± 0.82
	Munc13-1 WT		5	5	69	No	8.55 ± 0.78	p < 0.01	Mann-Whitney
	Munc13-1 K720E		5	5	70		11.48 ± 0.95
	Munc13-1 WT		4	4	54	No	9.20 ± 1.23	p < 0.05	Mann-Whitney
	Munc13-1 K706E		4	4	48		5.63 ± 0.65
	Munc13-1 WT		4	4	54	No	9.20 ± 1.23	p = 0.92	Mann-Whitney
	Munc13-1 R769E		4	4	51		8.48 ± 0.98
	Figure 6D		N°animals	N°cultures (N)	N° cells (n)	Parametric distribution	mean ± SEM	p-value	Statistical
	Pair pulse ratio					(Kolmogorov-Smirnov test)			test
	Munc13-1 WT		5	5	72	No	0.94 ± 0.03	p = 0.15	Mann-Whitney
	Munc13-1 K603E		5	5	68		0.95 ± 0.06
	Munc13-1 WT		5	5	72	No	0.94 ± 0.03	p < 0.01	Mann-Whitney
	Munc13-1 K720E		5	5	71		0.80 ± 0.02
	Munc13-1 WT		4	4	48	No	1.07 ± 0.06	p < 0.05	Mann- Whitney
	Munc13-1 K706E		4	4	47		1.33 ± 0.10
	Munc13-1 WT		4	4	48	No	1.06 ± 0.05	p = 0.95	Mann-Whitney
	Munc13-1 R769E		4	4	51		0.95 ± 0.06
