# Supplementary material for: Control of neurotransmitter release by two distinct membrane-binding faces of the Munc13-1 C1C2B region
Source: eLife journal article supplement (doi:10.7554/elife.72030), 2021-11-15
Supplement: supp [file elife-72030-supp-v1.zip › elife_poa_e72030_Figure_7_source_data_1.xlsx]

## Sheet: Figure 7
	Summary table Figure 7. Values and statistics corresponding to Figure 7
	Figure 7A		N°animals	N°cultures	N° cells	Parametric distribution	Normalized	p-value	Statistical
	Sucrose charge			(N)	(n)	(Kolmogorov-Smirnov test)	mean ± SEM		test
	Munc13-1 WT		5	5	69	No	1.00 ± 0.12	p < 0.001	Mann-Whitney
	Munc13-1 K603E/K720E		5	5	64		0.45 ± 0.06
	Munc13-1 WT		6	6	79	No	1.00 ± 0.11	p < 0.001	Mann-Whitney
	Munc13-1 K706E/R769E		6	6	54		0.27 ± 0.03
	Munc13-1 WT		5	5	58	No	1.00 ± 0.14	p < 0.001	Mann- Whitney
	Munc13-1 K603E/K720E		5	5	25		0.25 ± 0.11
	K706E/R769E
	Figure 7B		N°animals	N°cultures	N° cells	Parametric distribution	Normalized	p-value	Statistical
	EPSC Amplitude			(N)	(n)	(Kolmogorov-Smirnov test)	mean ± SEM		test
	Munc13-1 WT		5	5	73	No	1.00 ± 0.10	p < 0.001	Mann-Whitney
	Munc13-1 K603E/K720E		5	5	66		0.58 ± 0.08
	Munc13-1 WT		6	6	83	No	1.00 ± 0.10	p < 0.001	Mann-Whitney
	Munc13-1 K706E/R769E		6	6	62		0.27 ± 0.04
	Munc13-1 WT		5	5	64	No	1.00 ± 0.11	p < 0.001	Mann- Whitney
	Munc13-1 K603E/K720E		5	5	25		0.12 ± 0.02
	K706E/R769E
	Figure 7C		N°animals	N°cultures	N° cells	Parametric distribution	mean ± SEM	p-value	Statistical
	Vesicular release probability (%)			(N)	(n)	(Kolmogorov-Smirnov test)			test
	Munc13-1 WT		5	5	69	No	8.55± 0.78	p = 0.29	Mann-Whitney
	Munc13-1 K603E/K720E		5	5	64		9.97 ± 0.99
	Munc13-1 WT		6	6	79	No	9.22 ± 0.97	p = 0.09	Mann-Whitney
	Munc13-1 K706E/R769E		6	6	54		6.87 ± 0.88
	Munc13-1 WT		5	5	64	No	9.52 ± 1.11	p = 0.06	Mann- Whitney
	Munc13-1 K603E/K720E		5	5	25		5.82 ± 1.08
	K706E/R769E
