# Supplementary material for: Control of neurotransmitter release by two distinct membrane-binding faces of the Munc13-1 C1C2B region
Source: eLife journal article supplement (doi:10.7554/elife.72030), 2021-11-15
Supplement: supp [file elife-72030-supp-v1.zip › elife_poa_e72030_Figure_8_source_data_1.xlsx]

## Sheet: Figure 8B
		DKO + Munc13-1 WT		DKO + Munc13-1 K603E
		n = 71		n = 67
	Time (s)	Average EPSC Amplitude (nA)	SEM	Average EPSC Amplitude (nA)	SEM
	0.1	1.97863	0.187102	1.12623	0.238757
	0.2	1.5581	0.160816	0.82765	0.173517
	0.3	1.39524	0.152389	0.665631	0.144017
	0.4	1.31777	0.144125	0.638538	0.132749
	0.5	1.29359	0.14034	0.593776	0.126791
	0.6	1.25261	0.138944	0.564017	0.120017
	0.7	1.21231	0.136111	0.601369	0.127601
	0.8	1.20043	0.136887	0.59076	0.127608
	0.9	1.19012	0.136927	0.565774	0.121337
	1	1.21154	0.140935	0.567123	0.125628
	1.1	1.20439	0.13966	0.552398	0.124791
	1.2	1.16144	0.133898	0.573811	0.135067
	1.3	1.15761	0.133615	0.58184	0.135484
	1.4	1.15964	0.136331	0.575957	0.132024
	1.5	1.17852	0.138019	0.536982	0.12385
	1.6	1.14691	0.13435	0.548647	0.123922
	1.7	1.14058	0.135242	0.567979	0.133393
	1.8	1.16194	0.139095	0.588611	0.13943
	1.9	1.13719	0.133352	0.561584	0.132228
	2	1.15558	0.137908	0.575232	0.13052
	2.1	1.14539	0.137954	0.579956	0.134857
	2.2	1.12094	0.131233	0.559707	0.132143
	2.3	1.13005	0.134804	0.580702	0.136883
	2.4	1.10782	0.133179	0.572431	0.138309
	2.5	1.11867	0.13488	0.570869	0.133362
	2.6	1.11776	0.134377	0.565043	0.135659
	2.7	1.10406	0.136605	0.596493	0.145142
	2.8	1.1011	0.132079	0.559319	0.132653
	2.9	1.10622	0.133417	0.579243	0.143655
	3	1.11776	0.134809	0.569907	0.136636
	3.1	1.11974	0.135	0.580455	0.144269
	3.2	1.10515	0.13581	0.583879	0.142136
	3.3	1.11925	0.135994	0.577755	0.141624
	3.4	1.08777	0.133125	0.576978	0.140158
	3.5	1.0734	0.128498	0.593424	0.146685
	3.6	1.09184	0.130652	0.584611	0.142469
	3.7	1.09529	0.138658	0.60284	0.146904
	3.8	1.09169	0.135659	0.581163	0.144946
	3.9	1.09343	0.130737	0.571241	0.144211
	4	1.1051	0.134881	0.592751	0.145885
	4.1	1.10584	0.13293	0.596536	0.151811
	4.2	1.07393	0.132004	0.572307	0.141209
	4.3	1.06766	0.133814	0.580478	0.141856
	4.4	1.07333	0.13353	0.585784	0.146238
	4.5	1.08533	0.130576	0.576226	0.137792
	4.6	1.0864	0.134442	0.584932	0.148352
	4.7	1.0715	0.133109	0.6088	0.147922
	4.8	1.07559	0.13003	0.59602	0.147899
	4.9	1.04049	0.130492	0.596826	0.150771
	5	1.06562	0.130205	0.576405	0.138321

## Sheet: Figure 8C
		DKO + Munc13-1 WT		DKO + Munc13-1 K603E
		n = 71		n = 67
	Time (s)	Normalized EPSC Amplitude	SEM	Normalized EPSC Amplitude	SEM
	0.1	1	0	1	0
	0.2	0.808395	0.035799	0.862276	0.0518545
	0.3	0.695075	0.0324758	0.718528	0.0649413
	0.4	0.664203	0.0326057	0.684359	0.0397503
	0.5	0.673844	0.0390966	0.704698	0.0836235
	0.6	0.634488	0.0332491	0.71416	0.0832064
	0.7	0.618787	0.0366589	0.70418	0.0498845
	0.8	0.613106	0.0317218	0.682494	0.0526541
	0.9	0.632225	0.0387337	0.642706	0.04679
	1	0.61929	0.0341579	0.685828	0.0620827
	1.1	0.633221	0.0391042	0.65364	0.0627645
	1.2	0.629419	0.0471625	0.659507	0.0685641
	1.3	0.635839	0.0546599	0.668704	0.0530007
	1.4	0.626182	0.043295	0.701879	0.0718616
	1.5	0.644639	0.0495877	0.674571	0.06674
	1.6	0.608534	0.0445607	0.733641	0.0832282
	1.7	0.637432	0.0488451	0.675464	0.0546298
	1.8	0.65413	0.0556613	0.679287	0.0574314
	1.9	0.612728	0.0394917	0.689786	0.0746316
	2	0.62945	0.0495752	0.687451	0.0602071
	2.1	0.618563	0.0406125	0.721726	0.0618852
	2.2	0.632082	0.0574428	0.707805	0.073571
	2.3	0.607031	0.0506135	0.750075	0.0763266
	2.4	0.613747	0.0488391	0.699257	0.0639583
	2.5	0.603789	0.0429902	0.719093	0.0608843
	2.6	0.630543	0.0542197	0.750428	0.0873228
	2.7	0.602689	0.0604298	0.721258	0.0688492
	2.8	0.618917	0.0562836	0.679338	0.0566209
	2.9	0.627397	0.0539519	0.69185	0.0657016
	3	0.63929	0.0641504	0.705779	0.0615791
	3.1	0.618536	0.0496099	0.767879	0.105809
	3.2	0.604712	0.0453028	0.728662	0.0674636
	3.3	0.608685	0.0464331	0.726431	0.0703825
	3.4	0.613407	0.0586116	0.699495	0.056426
	3.5	0.595028	0.0458104	0.758084	0.0777728
	3.6	0.633646	0.0679251	0.777431	0.0813121
	3.7	0.605466	0.0619447	0.729648	0.0661259
	3.8	0.628032	0.0622386	0.772034	0.0861927
	3.9	0.653046	0.0795575	0.671959	0.0590103
	4	0.625035	0.055616	0.721422	0.0686354
	4.1	0.628355	0.0550473	0.689154	0.0570767
	4.2	0.60295	0.0542459	0.695936	0.0592093
	4.3	0.596601	0.0500979	0.722183	0.0682107
	4.4	0.612737	0.0560314	0.757064	0.0924438
	4.5	0.651477	0.067248	0.751085	0.0715282
	4.6	0.596809	0.0473819	0.708692	0.0613978
	4.7	0.61997	0.0710256	0.744818	0.0628745
	4.8	0.593851	0.0505516	0.765836	0.0718989
	4.9	0.60696	0.0718855	0.706732	0.0649245
	5	0.619043	0.0826969	0.752761	0.0725177

## Sheet: Figure 8E
		DKO + Munc13-1 WT		DKO + Munc13-1 K720E
		n = 71		n = 68
	Time (s)	Average EPSC Amplitude (nA)	SEM	Average EPSC Amplitude (nA)	SEM
	0.1	1.97863	0.187102	2.88337	0.299929
	0.2	1.5581	0.160816	1.97877	0.218466
	0.3	1.39524	0.152389	1.58256	0.181612
	0.4	1.31777	0.144125	1.46387	0.175526
	0.5	1.29359	0.14034	1.32893	0.15997
	0.6	1.25261	0.138944	1.26479	0.151034
	0.7	1.21231	0.136111	1.24799	0.152699
	0.8	1.20043	0.136887	1.21178	0.149272
	0.9	1.19012	0.136927	1.18999	0.148055
	1	1.21154	0.140935	1.19793	0.149545
	1.1	1.20439	0.13966	1.17344	0.145445
	1.2	1.16144	0.133898	1.19254	0.147594
	1.3	1.15761	0.133615	1.1788	0.146031
	1.4	1.15964	0.136331	1.16525	0.142649
	1.5	1.17852	0.138019	1.1473	0.139828
	1.6	1.14691	0.13435	1.16847	0.136789
	1.7	1.14058	0.135242	1.16126	0.141686
	1.8	1.16194	0.139095	1.13639	0.135749
	1.9	1.13719	0.133352	1.15975	0.141643
	2	1.15558	0.137908	1.12748	0.140161
	2.1	1.14539	0.137954	1.129	0.13671
	2.2	1.12094	0.131233	1.14367	0.138508
	2.3	1.13005	0.134804	1.17641	0.145079
	2.4	1.10782	0.133179	1.11592	0.13989
	2.5	1.11867	0.13488	1.12304	0.143396
	2.6	1.11776	0.134377	1.14181	0.139528
	2.7	1.10406	0.136605	1.13913	0.142357
	2.8	1.1011	0.132079	1.16416	0.143902
	2.9	1.10622	0.133417	1.13531	0.139237
	3	1.11776	0.134809	1.12577	0.139195
	3.1	1.11974	0.135	1.14096	0.139012
	3.2	1.10515	0.13581	1.12409	0.138136
	3.3	1.11925	0.135994	1.13318	0.142904
	3.4	1.08777	0.133125	1.13476	0.14701
	3.5	1.0734	0.128498	1.14464	0.142531
	3.6	1.09184	0.130652	1.15193	0.146384
	3.7	1.09529	0.138658	1.12796	0.139055
	3.8	1.09169	0.135659	1.10487	0.139794
	3.9	1.09343	0.130737	1.13799	0.143262
	4	1.1051	0.134881	1.09834	0.134396
	4.1	1.10584	0.13293	1.11854	0.139799
	4.2	1.07393	0.132004	1.10792	0.142688
	4.3	1.06766	0.133814	1.12535	0.142489
	4.4	1.07333	0.13353	1.1319	0.135431
	4.5	1.08533	0.130576	1.1037	0.139629
	4.6	1.0864	0.134442	1.09333	0.135926
	4.7	1.0715	0.133109	1.08515	0.139906
	4.8	1.07559	0.13003	1.11563	0.137143
	4.9	1.04049	0.130492	1.1123	0.139332
	5	1.06562	0.130205	1.09771	0.132905

## Sheet: Figure 8F
		DKO + Munc13-1 WT		DKO + Munc13-1 K720E
		n = 71		n = 68
	Time (s)	Normalized EPSC Amplitude	SEM	Normalized EPSC Amplitude	SEM
	0.1	1	0	1	0
	0.2	0.808395	0.035799	0.675971	0.0204411
	0.3	0.695075	0.0324758	0.553909	0.0226064
	0.4	0.664203	0.0326057	0.509189	0.0225122
	0.5	0.673844	0.0390966	0.463002	0.0211947
	0.6	0.634488	0.0332491	0.449087	0.0207962
	0.7	0.618787	0.0366589	0.441302	0.0219679
	0.8	0.613106	0.0317218	0.426446	0.0213403
	0.9	0.632225	0.0387337	0.423828	0.022991
	1	0.61929	0.0341579	0.419456	0.0221365
	1.1	0.633221	0.0391042	0.414956	0.0221331
	1.2	0.629419	0.0471625	0.429871	0.0222467
	1.3	0.635839	0.0546599	0.425235	0.0220373
	1.4	0.626182	0.043295	0.417474	0.0224272
	1.5	0.644639	0.0495877	0.409368	0.0225366
	1.6	0.608534	0.0445607	0.427497	0.0215845
	1.7	0.637432	0.0488451	0.418671	0.0225558
	1.8	0.65413	0.0556613	0.413922	0.0213035
	1.9	0.612728	0.0394917	0.422222	0.0226933
	2	0.62945	0.0495752	0.400496	0.0232632
	2.1	0.618563	0.0406125	0.408054	0.0225931
	2.2	0.632082	0.0574428	0.423206	0.0242867
	2.3	0.607031	0.0506135	0.423381	0.0235951
	2.4	0.613747	0.0488391	0.408766	0.0244633
	2.5	0.603789	0.0429902	0.412158	0.0252131
	2.6	0.630543	0.0542197	0.418099	0.0233561
	2.7	0.602689	0.0604298	0.414226	0.0245878
	2.8	0.618917	0.0562836	0.424983	0.0243269
	2.9	0.627397	0.0539519	0.416701	0.0251044
	3	0.63929	0.0641504	0.414265	0.0248552
	3.1	0.618536	0.0496099	0.41506	0.0246145
	3.2	0.604712	0.0453028	0.418471	0.0254479
	3.3	0.608685	0.0464331	0.412059	0.0241523
	3.4	0.613407	0.0586116	0.401708	0.0240537
	3.5	0.595028	0.0458104	0.428165	0.0266128
	3.6	0.633646	0.0679251	0.41363	0.0261258
	3.7	0.605466	0.0619447	0.414731	0.0234957
	3.8	0.628032	0.0622386	0.408561	0.0260858
	3.9	0.653046	0.0795575	0.417959	0.0257851
	4	0.625035	0.055616	0.413292	0.0256308
	4.1	0.628355	0.0550473	0.411019	0.0250819
	4.2	0.60295	0.0542459	0.405484	0.0259552
	4.3	0.596601	0.0500979	0.420154	0.0270815
	4.4	0.612737	0.0560314	0.424263	0.025486
	4.5	0.651477	0.067248	0.398538	0.0233382
	4.6	0.596809	0.0473819	0.408106	0.025664
	4.7	0.61997	0.0710256	0.389547	0.025028
	4.8	0.593851	0.0505516	0.414547	0.0250947
	4.9	0.60696	0.0718855	0.415248	0.0261255
	5	0.619043	0.0826969	0.421129	0.0281318

## Sheet: Figure 8H
		DKO + Munc13-1 WT		DKO + Munc13-1 K706E
		n = 52		n = 47
	Time (s)	Average EPSC Amplitude (nA)	SEM	Average EPSC Amplitude (nA)	SEM
	0.1	2.73326	0.375047	1.76124	0.277801
	0.2	2.1682	0.26046	1.46074	0.234948
	0.3	2.01928	0.232927	1.33072	0.216688
	0.4	1.87088	0.220348	1.28267	0.212527
	0.5	1.85187	0.213925	1.24598	0.200242
	0.6	1.78823	0.204715	1.24669	0.199344
	0.7	1.72002	0.205978	1.21832	0.191909
	0.8	1.76353	0.208541	1.23513	0.201165
	0.9	1.79115	0.21279	1.22021	0.188129
	1	1.74407	0.2058	1.27915	0.192927
	1.1	1.78041	0.208908	1.25192	0.198617
	1.2	1.74209	0.205792	1.23799	0.197208
	1.3	1.74185	0.210605	1.22559	0.196728
	1.4	1.76691	0.208311	1.24619	0.193741
	1.5	1.76711	0.21328	1.27531	0.19887
	1.6	1.74175	0.211976	1.2501	0.197667
	1.7	1.75333	0.213973	1.21355	0.1881
	1.8	1.74998	0.212919	1.21271	0.189969
	1.9	1.72757	0.206714	1.24202	0.196032
	2	1.73742	0.210672	1.2372	0.194353
	2.1	1.76282	0.209203	1.26951	0.20127
	2.2	1.72821	0.207204	1.2609	0.196776
	2.3	1.72194	0.202601	1.29338	0.200868
	2.4	1.71473	0.209629	1.23408	0.190738
	2.5	1.7118	0.207868	1.23121	0.192843
	2.6	1.71737	0.208408	1.25322	0.196855
	2.7	1.69242	0.209681	1.27133	0.198617
	2.8	1.69378	0.207585	1.25806	0.195019
	2.9	1.72834	0.217701	1.24227	0.194691
	3	1.70294	0.207605	1.23577	0.194011
	3.1	1.71659	0.206256	1.24833	0.195418
	3.2	1.68857	0.205776	1.26286	0.193216
	3.3	1.69088	0.202773	1.25361	0.192152
	3.4	1.66458	0.206468	1.25514	0.197005
	3.5	1.66504	0.207546	1.24189	0.191843
	3.6	1.68046	0.20428	1.27034	0.197601
	3.7	1.73807	0.214866	1.252	0.19273
	3.8	1.66378	0.202349	1.24311	0.193222
	3.9	1.65717	0.209193	1.26308	0.198851
	4	1.69573	0.207952	1.26593	0.193496
	4.1	1.69293	0.20625	1.25172	0.194437
	4.2	1.69788	0.213326	1.26922	0.189418
	4.3	1.68533	0.208698	1.22663	0.1939
	4.4	1.68094	0.208521	1.2521	0.18983
	4.5	1.67719	0.202568	1.20314	0.18852
	4.6	1.66685	0.209447	1.24456	0.188382
	4.7	1.67461	0.204291	1.25289	0.189801
	4.8	1.6701	0.203718	1.23741	0.194554
	4.9	1.6619	0.197853	1.24989	0.189268
	5	1.6526	0.202292	1.27103	0.19568

## Sheet: Figure 8I
		DKO + Munc13-1 WT		DKO + Munc13-1 K706E
		n = 52		n = 47
	Time (s)	Normalized EPSC Amplitude	SEM	Normalized EPSC Amplitude	SEM
	0.1	1	0	1	0
	0.2	0.870733	0.0392578	0.873573	0.0392654
	0.3	0.853715	0.0458023	0.797376	0.048791
	0.4	0.787913	0.046669	0.754059	0.0480956
	0.5	0.810523	0.0502954	0.757678	0.0515226
	0.6	0.782704	0.0490304	0.753065	0.0554982
	0.7	0.758401	0.0544208	0.776547	0.0564868
	0.8	0.796165	0.0600504	0.770096	0.0595548
	0.9	0.791264	0.057796	0.792148	0.0544921
	1	0.789956	0.0604758	0.872296	0.0778481
	1.1	0.812201	0.0626331	0.805104	0.0596895
	1.2	0.791145	0.0611702	0.798335	0.0643275
	1.3	0.778265	0.0581365	0.826767	0.074348
	1.4	0.827672	0.0751036	0.845927	0.0817904
	1.5	0.798476	0.0605635	0.858836	0.0841897
	1.6	0.783132	0.0619534	0.839128	0.073942
	1.7	0.801018	0.0640208	0.829333	0.0771577
	1.8	0.813893	0.0696016	0.838503	0.0759048
	1.9	0.791738	0.0634627	0.887744	0.0877331
	2	0.797238	0.0678048	0.835275	0.0766796
	2.1	0.842238	0.0742397	0.862621	0.0770206
	2.2	0.773905	0.0588535	0.857003	0.0732032
	2.3	0.805286	0.0655128	0.924553	0.0943526
	2.4	0.777675	0.0627609	0.851565	0.0773015
	2.5	0.804572	0.0691777	0.878253	0.0945127
	2.6	0.805301	0.0670128	0.87073	0.0859222
	2.7	0.774427	0.0633747	0.903576	0.0958648
	2.8	0.78615	0.0709936	0.870161	0.0775283
	2.9	0.791484	0.0659001	0.871196	0.079779
	3	0.79115	0.0656763	0.85967	0.0736749
	3.1	0.812904	0.0669589	0.886318	0.0895573
	3.2	0.775596	0.0639589	0.891407	0.0815643
	3.3	0.798651	0.0759366	0.865018	0.0777497
	3.4	0.776064	0.0658536	0.895092	0.0857381
	3.5	0.768444	0.0662023	0.87508	0.0884911
	3.6	0.783789	0.0670675	0.917217	0.0933035
	3.7	0.806185	0.0682885	0.884585	0.0784749
	3.8	0.776889	0.0691817	0.86482	0.0809209
	3.9	0.75441	0.0637242	0.882989	0.084139
	4	0.812261	0.0760283	0.897518	0.0805102
	4.1	0.803235	0.0721948	0.897633	0.0835346
	4.2	0.785579	0.0673849	0.911399	0.0877195
	4.3	0.792883	0.0713985	0.853188	0.0764916
	4.4	0.794508	0.071922	0.936136	0.103766
	4.5	0.795354	0.0724564	0.870936	0.0817358
	4.6	0.767647	0.0662251	0.917366	0.0913154
	4.7	0.789021	0.0723227	0.898497	0.0863244
	4.8	0.799753	0.074658	0.892394	0.0871406
	4.9	0.772638	0.0659439	0.932495	0.0969873
	5	0.785286	0.0710424	0.959764	0.114572

## Sheet: Figure 8K
		DKO + Munc13-1 WT		DKO + Munc13-1 R769E
		n = 52		n = 46
	Time (s)	Average EPSC Amplitude (nA)	SEM	Average EPSC Amplitude (nA)	SEM
	0.1	2.73326	0.375047	1.10289	0.135893
	0.2	2.1682	0.26046	0.725621	0.0887541
	0.3	2.01928	0.232927	0.605939	0.0754077
	0.4	1.87088	0.220348	0.515145	0.0630937
	0.5	1.85187	0.213925	0.496314	0.0586109
	0.6	1.78823	0.204715	0.458742	0.0553734
	0.7	1.72002	0.205978	0.474808	0.0574078
	0.8	1.76353	0.208541	0.457531	0.0539568
	0.9	1.79115	0.21279	0.440723	0.052919
	1	1.74407	0.2058	0.451564	0.0567824
	1.1	1.78041	0.208908	0.465228	0.053585
	1.2	1.74209	0.205792	0.448179	0.056068
	1.3	1.74185	0.210605	0.446128	0.0529173
	1.4	1.76691	0.208311	0.444861	0.0528964
	1.5	1.76711	0.21328	0.455123	0.0566703
	1.6	1.74175	0.211976	0.462158	0.0542041
	1.7	1.75333	0.213973	0.441939	0.0540588
	1.8	1.74998	0.212919	0.455251	0.0548914
	1.9	1.72757	0.206714	0.455261	0.0555624
	2	1.73742	0.210672	0.482205	0.0589233
	2.1	1.76282	0.209203	0.456424	0.0560062
	2.2	1.72821	0.207204	0.456543	0.0511635
	2.3	1.72194	0.202601	0.462972	0.0542642
	2.4	1.71473	0.209629	0.44355	0.0502019
	2.5	1.7118	0.207868	0.460306	0.05713
	2.6	1.71737	0.208408	0.465144	0.0582207
	2.7	1.69242	0.209681	0.442371	0.0552488
	2.8	1.69378	0.207585	0.4713	0.0568953
	2.9	1.72834	0.217701	0.445671	0.0541723
	3	1.70294	0.207605	0.454306	0.05341
	3.1	1.71659	0.206256	0.47996	0.054275
	3.2	1.68857	0.205776	0.46968	0.054141
	3.3	1.69088	0.202773	0.480469	0.0576736
	3.4	1.66458	0.206468	0.474693	0.0579876
	3.5	1.66504	0.207546	0.460543	0.0560523
	3.6	1.68046	0.20428	0.472738	0.056216
	3.7	1.73807	0.214866	0.474293	0.05529
	3.8	1.66378	0.202349	0.471462	0.0556626
	3.9	1.65717	0.209193	0.485553	0.0559214
	4	1.69573	0.207952	0.467823	0.0541851
	4.1	1.69293	0.20625	0.500053	0.0604391
	4.2	1.69788	0.213326	0.482892	0.0515966
	4.3	1.68533	0.208698	0.466144	0.0528609
	4.4	1.68094	0.208521	0.481915	0.0563057
	4.5	1.67719	0.202568	0.4624	0.054394
	4.6	1.66685	0.209447	0.505344	0.0594018
	4.7	1.67461	0.204291	0.513379	0.0603317
	4.8	1.6701	0.203718	0.505275	0.0563899
	4.9	1.6619	0.197853	0.501592	0.0590152
	5	1.6526	0.202292	0.505115	0.0603885

## Sheet: Figure 8L
		DKO + Munc13-1 WT		DKO + Munc13-1 R769E
		n = 52		n = 46
	Time (s)	Normalized EPSC Amplitude	SEM	Normalized EPSC Amplitude	SEM
	0.1	1	0	1	0
	0.2	0.870733	0.0392578	0.73143	0.0340562
	0.3	0.853715	0.0458023	0.621076	0.0324656
	0.4	0.787913	0.046669	0.578806	0.0442893
	0.5	0.810523	0.0502954	0.53158	0.03297
	0.6	0.782704	0.0490304	0.513112	0.0342308
	0.7	0.758401	0.0544208	0.525071	0.0389135
	0.8	0.796165	0.0600504	0.510283	0.0398361
	0.9	0.791264	0.057796	0.489072	0.0363444
	1	0.789956	0.0604758	0.497138	0.0365396
	1.1	0.812201	0.0626331	0.521285	0.0339778
	1.2	0.791145	0.0611702	0.495443	0.0365059
	1.3	0.778265	0.0581365	0.518903	0.044649
	1.4	0.827672	0.0751036	0.501112	0.0381089
	1.5	0.798476	0.0605635	0.505209	0.0356252
	1.6	0.783132	0.0619534	0.533808	0.0376103
	1.7	0.801018	0.0640208	0.519787	0.0403008
	1.8	0.813893	0.0696016	0.529589	0.0435468
	1.9	0.791738	0.0634627	0.519981	0.041338
	2	0.797238	0.0678048	0.579536	0.0459713
	2.1	0.842238	0.0742397	0.521703	0.0390597
	2.2	0.773905	0.0588535	0.545684	0.0426676
	2.3	0.805286	0.0655128	0.541971	0.0461418
	2.4	0.777675	0.0627609	0.510618	0.0425858
	2.5	0.804572	0.0691777	0.525101	0.0392468
	2.6	0.805301	0.0670128	0.526208	0.0386805
	2.7	0.774427	0.0633747	0.515463	0.0412802
	2.8	0.78615	0.0709936	0.540449	0.0397043
	2.9	0.791484	0.0659001	0.530472	0.0451936
	3	0.79115	0.0656763	0.555469	0.0449077
	3.1	0.812904	0.0669589	0.558919	0.0444305
	3.2	0.775596	0.0639589	0.551202	0.0421001
	3.3	0.798651	0.0759366	0.559884	0.0410803
	3.4	0.776064	0.0658536	0.540813	0.0448076
	3.5	0.768444	0.0662023	0.55206	0.0459478
	3.6	0.783789	0.0670675	0.569946	0.0474841
	3.7	0.806185	0.0682885	0.554578	0.0470444
	3.8	0.776889	0.0691817	0.578443	0.0470895
	3.9	0.75441	0.0637242	0.576269	0.0425401
	4	0.812261	0.0760283	0.597045	0.0538175
	4.1	0.803235	0.0721948	0.597056	0.0471243
	4.2	0.785579	0.0673849	0.6072	0.0506442
	4.3	0.792883	0.0713985	0.563811	0.0426934
	4.4	0.794508	0.071922	0.587927	0.0496156
	4.5	0.795354	0.0724564	0.578277	0.0507846
	4.6	0.767647	0.0662251	0.618215	0.0513177
	4.7	0.789021	0.0723227	0.633516	0.0576892
	4.8	0.799753	0.074658	0.617604	0.0514936
	4.9	0.772638	0.0659439	0.596813	0.0464238
	5	0.785286	0.0710424	0.610483	0.0488915
