# Supplementary material for: Control of neurotransmitter release by two distinct membrane-binding faces of the Munc13-1 C1C2B region
Source: eLife journal article supplement (doi:10.7554/elife.72030), 2021-11-15
Supplement: supp [file elife-72030-supp-v1.zip › elife_poa_e72030_Figure_9_source_data_1.xlsx]

## Sheet: Figure 9B
		DKO + Munc13-1 WT		DKO + Munc13-1 K603E/K720E
		n = 71		n = 61
	Time (s)	Average EPSC Amplitude (nA)	SEM	Average EPSC Amplitude (nA)	SEM
	0.1	1.97863	0.187102	1.19429	0.186653
	0.2	1.5581	0.160816	0.822925	0.129435
	0.3	1.39524	0.152389	0.631896	0.0965085
	0.4	1.31777	0.144125	0.538092	0.0820431
	0.5	1.29359	0.14034	0.500166	0.0791903
	0.6	1.25261	0.138944	0.48754	0.0755808
	0.7	1.21231	0.136111	0.459022	0.0672061
	0.8	1.20043	0.136887	0.483506	0.0753097
	0.9	1.19012	0.136927	0.47605	0.0731897
	1	1.21154	0.140935	0.452439	0.0682226
	1.1	1.20439	0.13966	0.471087	0.0726965
	1.2	1.16144	0.133898	0.460714	0.0720111
	1.3	1.15761	0.133615	0.458083	0.0698944
	1.4	1.15964	0.136331	0.481046	0.0754744
	1.5	1.17852	0.138019	0.468527	0.0715609
	1.6	1.14691	0.13435	0.459167	0.0738428
	1.7	1.14058	0.135242	0.476914	0.0700148
	1.8	1.16194	0.139095	0.448664	0.074327
	1.9	1.13719	0.133352	0.465916	0.0729602
	2	1.15558	0.137908	0.453858	0.0679688
	2.1	1.14539	0.137954	0.478255	0.0805072
	2.2	1.12094	0.131233	0.445288	0.069716
	2.3	1.13005	0.134804	0.470635	0.0753914
	2.4	1.10782	0.133179	0.467314	0.0745246
	2.5	1.11867	0.13488	0.470733	0.0683679
	2.6	1.11776	0.134377	0.484047	0.0809533
	2.7	1.10406	0.136605	0.483771	0.0715399
	2.8	1.1011	0.132079	0.476714	0.0706465
	2.9	1.10622	0.133417	0.484598	0.0737158
	3	1.11776	0.134809	0.483063	0.0747496
	3.1	1.11974	0.135	0.470238	0.074262
	3.2	1.10515	0.13581	0.470003	0.071622
	3.3	1.11925	0.135994	0.479245	0.0751042
	3.4	1.08777	0.133125	0.494753	0.0786325
	3.5	1.0734	0.128498	0.488202	0.0735482
	3.6	1.09184	0.130652	0.479666	0.0724302
	3.7	1.09529	0.138658	0.503693	0.0748862
	3.8	1.09169	0.135659	0.493399	0.0770974
	3.9	1.09343	0.130737	0.493608	0.0787451
	4	1.1051	0.134881	0.514004	0.0834557
	4.1	1.10584	0.13293	0.492392	0.0728374
	4.2	1.07393	0.132004	0.492291	0.0763662
	4.3	1.06766	0.133814	0.493393	0.0774557
	4.4	1.07333	0.13353	0.492119	0.0746724
	4.5	1.08533	0.130576	0.495031	0.0763837
	4.6	1.0864	0.134442	0.487418	0.0769987
	4.7	1.0715	0.133109	0.50048	0.0778057
	4.8	1.07559	0.13003	0.507443	0.0814663
	4.9	1.04049	0.130492	0.507067	0.0775989
	5	1.06562	0.130205	0.502351	0.0745329

## Sheet: Figure 9C
		DKO + Munc13-1 WT		DKO + Munc13-1 K603E/K720E
		n = 71		n = 61
	Time (s)	Normalized EPSC Amplitude	SEM	Normalized EPSC Amplitude	SEM
	0.1	1	0	1	0
	0.2	0.808395	0.035799	0.759669	0.0410925
	0.3	0.695075	0.0324758	0.611573	0.0443593
	0.4	0.664203	0.0326057	0.534212	0.034907
	0.5	0.673844	0.0390966	0.521623	0.0395517
	0.6	0.634488	0.0332491	0.48665	0.0302653
	0.7	0.618787	0.0366589	0.467599	0.0344981
	0.8	0.613106	0.0317218	0.49867	0.0366666
	0.9	0.632225	0.0387337	0.486607	0.0369451
	1	0.61929	0.0341579	0.462982	0.0366862
	1.1	0.633221	0.0391042	0.471809	0.0317644
	1.2	0.629419	0.0471625	0.485161	0.0386749
	1.3	0.635839	0.0546599	0.474527	0.0365324
	1.4	0.626182	0.043295	0.509815	0.0421861
	1.5	0.644639	0.0495877	0.481525	0.0372406
	1.6	0.608534	0.0445607	0.466072	0.0380982
	1.7	0.637432	0.0488451	0.497974	0.0429673
	1.8	0.65413	0.0556613	0.454071	0.0364378
	1.9	0.612728	0.0394917	0.474955	0.0349932
	2	0.62945	0.0495752	0.462048	0.0360004
	2.1	0.618563	0.0406125	0.469544	0.0376101
	2.2	0.632082	0.0574428	0.488529	0.0500954
	2.3	0.607031	0.0506135	0.483523	0.0418638
	2.4	0.613747	0.0488391	0.466237	0.0326521
	2.5	0.603789	0.0429902	0.502996	0.0472371
	2.6	0.630543	0.0542197	0.504374	0.046463
	2.7	0.602689	0.0604298	0.497859	0.0405764
	2.8	0.618917	0.0562836	0.508662	0.0482848
	2.9	0.627397	0.0539519	0.511325	0.0429176
	3	0.63929	0.0641504	0.483464	0.0357803
	3.1	0.618536	0.0496099	0.480481	0.0408822
	3.2	0.604712	0.0453028	0.494935	0.0413509
	3.3	0.608685	0.0464331	0.49808	0.0407421
	3.4	0.613407	0.0586116	0.515471	0.0444623
	3.5	0.595028	0.0458104	0.50651	0.0377728
	3.6	0.633646	0.0679251	0.511948	0.0492675
	3.7	0.605466	0.0619447	0.525093	0.0423204
	3.8	0.628032	0.0622386	0.512991	0.0418349
	3.9	0.653046	0.0795575	0.528949	0.0534429
	4	0.625035	0.055616	0.545439	0.0516936
	4.1	0.628355	0.0550473	0.541505	0.0504901
	4.2	0.60295	0.0542459	0.531329	0.0464454
	4.3	0.596601	0.0500979	0.52855	0.0467383
	4.4	0.612737	0.0560314	0.517944	0.0426465
	4.5	0.651477	0.067248	0.504221	0.0509008
	4.6	0.596809	0.0473819	0.500892	0.0400457
	4.7	0.61997	0.0710256	0.515647	0.0422627
	4.8	0.593851	0.0505516	0.543932	0.0574827
	4.9	0.60696	0.0718855	0.538919	0.0561453
	5	0.619043	0.0826969	0.537169	0.0468731

## Sheet: Figure 9E
		DKO + Munc13-1 WT		DKO + Munc13-1 K706E/R769E
		n = 77		n = 48
	Time (s)	Average EPSC Amplitude (nA)	SEM	Average EPSC Amplitude (nA)	SEM
	0.1	2.35273	0.273856	0.646727	0.0885192
	0.2	1.84986	0.197962	0.453177	0.0636225
	0.3	1.72962	0.179486	0.373972	0.0533182
	0.4	1.60418	0.170013	0.328055	0.0462637
	0.5	1.58054	0.164423	0.290477	0.0361643
	0.6	1.52682	0.160252	0.275993	0.0324756
	0.7	1.45401	0.158231	0.269007	0.0348426
	0.8	1.49606	0.16231	0.250572	0.0331028
	0.9	1.5174	0.163924	0.249146	0.0314474
	1	1.47708	0.159886	0.250805	0.0314858
	1.1	1.49151	0.163385	0.245207	0.0335679
	1.2	1.46374	0.159618	0.252481	0.031066
	1.3	1.46528	0.162159	0.244001	0.031298
	1.4	1.48004	0.161802	0.25298	0.0310383
	1.5	1.48439	0.165472	0.252247	0.0293077
	1.6	1.4666	0.162856	0.241625	0.0298309
	1.7	1.46526	0.165191	0.246982	0.0301092
	1.8	1.4662	0.165162	0.257707	0.0330681
	1.9	1.43532	0.160565	0.253942	0.0347986
	2	1.45517	0.164177	0.252579	0.0330727
	2.1	1.46401	0.162308	0.259223	0.0311554
	2.2	1.4384	0.160557	0.256719	0.0320512
	2.3	1.43693	0.157616	0.251999	0.0306727
	2.4	1.43715	0.162308	0.240431	0.0279001
	2.5	1.42289	0.160482	0.248255	0.0298034
	2.6	1.42253	0.160837	0.25988	0.0343561
	2.7	1.4139	0.161974	0.250393	0.028933
	2.8	1.4154	0.160526	0.257758	0.0318937
	2.9	1.42722	0.166471	0.245963	0.030574
	3	1.42711	0.161766	0.253851	0.0343391
	3.1	1.4344	0.159705	0.265284	0.0327047
	3.2	1.41312	0.159855	0.266883	0.0339412
	3.3	1.4084	0.157119	0.256184	0.0316727
	3.4	1.39154	0.159701	0.264771	0.0349759
	3.5	1.38315	0.159606	0.259261	0.0309387
	3.6	1.40787	0.158221	0.254184	0.0313069
	3.7	1.44836	0.166464	0.262797	0.0340736
	3.8	1.38613	0.156741	0.2505	0.0309514
	3.9	1.38761	0.159859	0.267664	0.0319752
	4	1.41198	0.160828	0.255889	0.0329185
	4.1	1.41489	0.159146	0.261559	0.0307162
	4.2	1.40598	0.163285	0.256955	0.028797
	4.3	1.39659	0.161179	0.268147	0.0373004
	4.4	1.39756	0.161033	0.275894	0.0338557
	4.5	1.39935	0.157593	0.256896	0.0314043
	4.6	1.39347	0.161646	0.278475	0.0340947
	4.7	1.39031	0.158222	0.271833	0.0324539
	4.8	1.39174	0.157927	0.280817	0.033424
	4.9	1.38391	0.15444	0.268715	0.0303821
	5	1.38228	0.156153	0.278771	0.0315545

## Sheet: Figure 9F
		DKO + Munc13-1 WT		DKO + Munc13-1 K706E/R769E
		n = 77		n = 48
	Time (s)	Normalized EPSC Amplitude	SEM	Normalized EPSC Amplitude	SEM
	0.1	1	0	1	0
	0.2	0.829106	0.0314419	0.740002	0.0348284
	0.3	0.810947	0.0387654	0.616208	0.0429826
	0.4	0.741734	0.0360946	0.55783	0.0434243
	0.5	0.760456	0.0413745	0.52789	0.033628
	0.6	0.721046	0.0403588	0.523105	0.0389229
	0.7	0.698757	0.046066	0.478774	0.0332419
	0.8	0.723852	0.0469981	0.457907	0.0401961
	0.9	0.734589	0.0464972	0.45609	0.0361375
	1	0.708059	0.0457517	0.464881	0.0409605
	1.1	0.72649	0.0498279	0.463859	0.0441876
	1.2	0.73663	0.0553991	0.479524	0.0332928
	1.3	0.725841	0.0568065	0.439813	0.0358758
	1.4	0.750385	0.0599506	0.506206	0.0490756
	1.5	0.743142	0.0563223	0.505557	0.0495257
	1.6	0.723816	0.0544789	0.468324	0.0402879
	1.7	0.739878	0.0564678	0.493968	0.040999
	1.8	0.761716	0.064202	0.47998	0.0421161
	1.9	0.70249	0.0493369	0.456291	0.0350182
	2	0.723614	0.0572201	0.470475	0.0385183
	2.1	0.744724	0.0577568	0.513639	0.043258
	2.2	0.716819	0.0594432	0.498648	0.0460493
	2.3	0.735127	0.0591418	0.483038	0.0401517
	2.4	0.719954	0.0563538	0.510855	0.0549978
	2.5	0.728491	0.0571496	0.506708	0.0461955
	2.6	0.733926	0.0600082	0.473825	0.0404453
	2.7	0.720639	0.064611	0.491553	0.0453588
	2.8	0.72417	0.0637129	0.505631	0.048171
	2.9	0.720681	0.0567828	0.482694	0.0401204
	3	0.744559	0.0685019	0.493166	0.0473986
	3.1	0.732198	0.0570771	0.541145	0.0531004
	3.2	0.709017	0.0537063	0.518749	0.0445515
	3.3	0.722245	0.0615856	0.501125	0.0458438
	3.4	0.719094	0.0639061	0.499302	0.0410189
	3.5	0.690055	0.0529944	0.504514	0.0414719
	3.6	0.737068	0.0692763	0.50258	0.0407041
	3.7	0.750142	0.0680027	0.503208	0.0448024
	3.8	0.72563	0.0672625	0.478724	0.0435306
	3.9	0.733671	0.0794676	0.532855	0.0478372
	4	0.747355	0.0673025	0.530731	0.055877
	4.1	0.746619	0.0647559	0.538291	0.050912
	4.2	0.717705	0.0619738	0.531964	0.0455928
	4.3	0.725854	0.0620642	0.495606	0.0389012
	4.4	0.729097	0.0644419	0.52556	0.0487169
	4.5	0.741895	0.0712146	0.537453	0.0524606
	4.6	0.701456	0.0571413	0.528876	0.0418512
	4.7	0.732612	0.0749757	0.558045	0.0513742
	4.8	0.727808	0.0635002	0.561123	0.0519477
	4.9	0.727312	0.0748524	0.553486	0.0486795
	5	0.754602	0.0856157	0.574324	0.0509972

## Sheet: Figure 9H
		DKO + Munc13-1 WT		DKO + Munc13-1 K603E/K720E/K706E/R769E
		n = 65		n = 16
	Time (s)	Average EPSC Amplitude (nA)	SEM	Average EPSC Amplitude (nA)	SEM
	0.1	2.21306	0.248298	0.400697	0.0664719
	0.2	1.86798	0.224714	0.289961	0.054989
	0.3	1.73488	0.206025	0.258425	0.0521893
	0.4	1.63831	0.197311	0.225123	0.0442454
	0.5	1.62947	0.191688	0.208686	0.048324
	0.6	1.5563	0.18798	0.208234	0.0460629
	0.7	1.50367	0.186437	0.216984	0.0504892
	0.8	1.55282	0.190927	0.212088	0.0464996
	0.9	1.55131	0.194945	0.215287	0.0509934
	1	1.53216	0.189892	0.196692	0.048029
	1.1	1.53359	0.193757	0.202999	0.0467889
	1.2	1.51231	0.188189	0.199622	0.0467657
	1.3	1.51664	0.190166	0.199445	0.0462833
	1.4	1.51429	0.189761	0.187823	0.0460915
	1.5	1.53297	0.195771	0.208323	0.0516026
	1.6	1.51652	0.193897	0.213608	0.0495358
	1.7	1.49964	0.194551	0.196969	0.0504075
	1.8	1.52159	0.198259	0.194176	0.0465754
	1.9	1.49064	0.190912	0.196745	0.0488129
	2	1.51614	0.19568	0.196091	0.0497691
	2.1	1.4997	0.192657	0.195098	0.0508233
	2.2	1.48353	0.19044	0.199902	0.0496393
	2.3	1.47669	0.187885	0.200083	0.0501385
	2.4	1.47789	0.192633	0.200099	0.0514169
	2.5	1.47716	0.190875	0.20271	0.0483448
	2.6	1.47658	0.192165	0.207112	0.0475607
	2.7	1.46124	0.192341	0.201767	0.0499363
	2.8	1.47282	0.19067	0.198137	0.0500062
	2.9	1.48892	0.197046	0.212783	0.0558473
	3	1.47613	0.193145	0.212418	0.0543251
	3.1	1.49336	0.190767	0.207427	0.0467964
	3.2	1.45668	0.190221	0.203731	0.0507013
	3.3	1.45072	0.18525	0.202726	0.0439691
	3.4	1.45402	0.190889	0.198366	0.0497944
	3.5	1.44605	0.188825	0.194961	0.0473207
	3.6	1.45004	0.188061	0.216135	0.0496376
	3.7	1.49227	0.197722	0.20975	0.0509864
	3.8	1.42866	0.188246	0.205305	0.0502877
	3.9	1.45824	0.19011	0.205231	0.0475986
	4	1.47506	0.192473	0.203422	0.0512761
	4.1	1.46911	0.187992	0.195995	0.0459623
	4.2	1.46439	0.194577	0.215917	0.0484408
	4.3	1.44553	0.192837	0.219293	0.0578903
	4.4	1.45268	0.189731	0.212703	0.0541976
	4.5	1.45126	0.186589	0.201455	0.0506646
	4.6	1.45991	0.193341	0.211187	0.0515053
	4.7	1.43904	0.18905	0.218916	0.0485626
	4.8	1.44342	0.186389	0.21248	0.0512363
	4.9	1.42194	0.1828	0.219124	0.0529699
	5	1.43565	0.18685	0.222145	0.0555654

## Sheet: Figure 9I
		DKO + Munc13-1 WT		DKO + Munc13-1 K603E/K720E/K706E/R769E
		n = 65		n = 16
	Time (s)	Normalized EPSC Amplitude	SEM	Normalized EPSC Amplitude	SEM
	0.1	1	0	1	0
	0.2	0.829803	0.0322443	0.71038	0.054792
	0.3	0.802692	0.0428406	0.637445	0.0486739
	0.4	0.73915	0.0379414	0.634801	0.0994654
	0.5	0.769222	0.0484256	0.491977	0.0588155
	0.6	0.70832	0.0426116	0.573009	0.102066
	0.7	0.685176	0.0447596	0.520161	0.0515804
	0.8	0.718427	0.0479349	0.534695	0.0625116
	0.9	0.705468	0.0455012	0.516542	0.0566263
	1	0.696876	0.0464332	0.477237	0.0591075
	1.1	0.703113	0.0487634	0.51562	0.087598
	1.2	0.739695	0.0615774	0.49558	0.0652131
	1.3	0.725585	0.063416	0.504576	0.0659339
	1.4	0.722866	0.0561802	0.466029	0.0551556
	1.5	0.732941	0.0609081	0.503734	0.0674481
	1.6	0.707398	0.0580862	0.527825	0.0591575
	1.7	0.725787	0.0604442	0.48515	0.079029
	1.8	0.741549	0.0673194	0.47136	0.0632388
	1.9	0.690563	0.0514392	0.489102	0.0757488
	2	0.709137	0.0597705	0.467065	0.0641155
	2.1	0.710838	0.0554416	0.496148	0.0844836
	2.2	0.713985	0.0684906	0.519003	0.0866142
	2.3	0.71726	0.0646541	0.490072	0.0658984
	2.4	0.700895	0.0612334	0.499006	0.0815522
	2.5	0.712025	0.0590535	0.51801	0.0716281
	2.6	0.719552	0.065803	0.521855	0.0639844
	2.7	0.718511	0.0747184	0.481999	0.0630605
	2.8	0.715148	0.0685758	0.495649	0.0743326
	2.9	0.720154	0.0637712	0.531238	0.0703954
	3	0.732106	0.0778416	0.530886	0.0753506
	3.1	0.724792	0.0640315	0.539717	0.0704746
	3.2	0.695636	0.0598687	0.50537	0.0658077
	3.3	0.698142	0.0620797	0.539465	0.0640174
	3.4	0.71064	0.0717255	0.489874	0.0688918
	3.5	0.685895	0.0580673	0.496979	0.0704903
	3.6	0.718538	0.0776309	0.582219	0.104922
	3.7	0.736439	0.0763089	0.537273	0.0719761
	3.8	0.696824	0.073258	0.518061	0.0663648
	3.9	0.745929	0.0926157	0.527918	0.0654272
	4	0.729289	0.0702989	0.493216	0.0649559
	4.1	0.74064	0.0716078	0.487032	0.0672033
	4.2	0.704203	0.0686102	0.535995	0.060998
	4.3	0.697636	0.0646976	0.529086	0.0747501
	4.4	0.721021	0.0694369	0.512187	0.066142
	4.5	0.732461	0.0795711	0.553694	0.101446
	4.6	0.688625	0.0623963	0.539573	0.0763891
	4.7	0.717581	0.0831759	0.576023	0.0677242
	4.8	0.711311	0.0669527	0.531772	0.0667298
	4.9	0.727352	0.0864842	0.585358	0.116309
	5	0.741236	0.096917	0.571726	0.0889499
