# Supplementary material for: Control of neurotransmitter release by two distinct membrane-binding faces of the Munc13-1 C1C2B region
Source: eLife journal article supplement (doi:10.7554/elife.72030), 2021-11-15
Supplement: supp [file elife-72030-supp-v1.zip › elife_poa_e72030_Figure_10_source_data_1.xlsx]

## Sheet: Figure 10A
		DKO + Munc13-1 WT		DKO + Munc13-1 K603E				DKO + Munc13-1 WT		DKO + Munc13-1 K720E				DKO + Munc13-1 WT		DKO + Munc13-1 K706E				DKO + Munc13-1 WT		DKO + Munc13-1 R769E				DKO + Munc13-1 WT		DKO + Munc13-1 K603E/K720E				DKO + Munc13-1 WT		DKO + Munc13-1 K706E/R769E				DKO + Munc13-1 WT		DKO + Munc13-1 K603E/K720E/K706E/R769E
		n = 58		n = 55				n = 58		n = 57				n = 38		n = 40				n = 36		n = 38				n = 58		n = 56				n = 57		n = 42				n = 54		n = 27
	Time (s)	Normalized EPSC Amplitude	SEM	Normalized EPSC Amplitude	SEM		Time (s)	Normalized EPSC Amplitude	SEM	Normalized EPSC Amplitude	SEM		Time (s)	Normalized EPSC Amplitude	SEM	Normalized EPSC Amplitude	SEM		Time (s)	Normalized EPSC Amplitude	SEM	Normalized EPSC Amplitude	SEM		Time (s)	Normalized EPSC Amplitude	SEM	Normalized EPSC Amplitude	SEM		Time (s)	Normalized EPSC Amplitude	SEM	Normalized EPSC Amplitude	SEM		Time (s)	Normalized EPSC Amplitude	SEM	Normalized EPSC Amplitude	SEM
	-25	1	0	1	0		-25	1	0	1	0		-25	1	0	1	0			1	0	1	0			1	0	1	0			1	0	1	0			1	0	1	0
	-20	0.94039	0.0197543	0.950038	0.0314554		-20	0.94039	0.0197543	0.973534	0.0167666		-20	0.966892	0.030474	0.93072	0.0301624			0.962595	0.031952	0.906489	0.0312115			0.94039	0.0197543	0.938693	0.026789			0.961331	0.0218267	0.95614	0.0329594			0.95806	0.0227048	1.09448	0.0755263
	-15	0.958992	0.0269557	0.9147	0.0193476		-15	0.958992	0.0269557	0.957051	0.0201088		-15	0.938127	0.0336396	0.941349	0.0266476			0.930031	0.0349988	0.894154	0.0317946			0.958992	0.0269557	0.939488	0.0272273			0.93169	0.0244815	0.946918	0.044043			0.923604	0.0188761	1.0538	0.0634588
	-10	0.929694	0.0238049	0.867751	0.0227184		-10	0.929694	0.0238049	0.936489	0.0186579		-10	0.960414	0.033409	0.854838	0.0362824			0.956037	0.0351336	0.881583	0.0325575			0.929694	0.0238049	0.882792	0.0273506			0.946671	0.023184	0.955405	0.0399685			0.923251	0.0211453	1.05757	0.0615751
	-5	0.917856	0.027104	0.841017	0.0256564		-5	0.917856	0.027104	0.922207	0.0298092		-5	0.917641	0.026647	0.885472	0.0221684			0.913263	0.0275445	0.844538	0.0274672			0.917856	0.027104	0.891224	0.0289177			0.926732	0.0212614	0.817394	0.031802			0.914131	0.019414	1.01842	0.067749
	0	0.824106	0.0261036	0.819911	0.0436837		0	0.824106	0.0261036	0.825742	0.0203386		0	0.898064	0.0866695	0.822169	0.0332943			0.894243	0.0914213	0.793957	0.0870913			0.824106	0.0261036	0.820063	0.0317598			0.867376	0.0592422	0.815938	0.042458			0.868989	0.0623779	0.956409	0.12778
	5	1.41205	0.0459307	1.4912	0.0578196		5	1.41205	0.0459307	1.25844	0.0272606		5	1.45258	0.0889978	1.32758	0.0456209			1.45802	0.093705	1.30054	0.0808737			1.41205	0.0459307	1.37255	0.0442815			1.42499	0.0614545	1.15277	0.0382679			1.39795	0.0632346	1.36046	0.109352
	10	1.62916	0.0626794	1.75923	0.0734727		10	1.62916	0.0626794	1.39075	0.0320285		10	1.66912	0.0905762	1.66126	0.10653			1.68624	0.0948168	1.65545	0.0852968			1.62916	0.0626794	1.8537	0.0812581			1.61097	0.0640476	1.627	0.0813087			1.58978	0.0657999	1.65905	0.125929
	15	1.69744	0.0635643	1.95959	0.0957756		15	1.69744	0.0635643	1.48671	0.040672		15	1.78125	0.10169	1.7488	0.0992985			1.80918	0.105396	1.8901	0.110954			1.69744	0.0635643	2.03506	0.0873874			1.71764	0.070719	1.82868	0.0949511			1.68235	0.0749422	1.74205	0.102376
	20	1.77227	0.0757866	2.10953	0.130844		20	1.77227	0.0757866	1.5086	0.0460746		20	1.85018	0.0970225	1.81177	0.103876			1.87878	0.100108	2.08659	0.125452			1.77227	0.0757866	2.18575	0.109579			1.78161	0.0695498	2.08242	0.133322			1.75502	0.072093	1.84701	0.101158
	25	1.82339	0.0804146	2.21222	0.133892		25	1.82339	0.0804146	1.55021	0.0502214		25	1.8638	0.100106	1.85322	0.121576			1.89354	0.103451	2.14539	0.137685			1.82339	0.0804146	2.37444	0.145807			1.83364	0.0793901	2.29481	0.155644			1.77001	0.0807715	2.0929	0.168357
	30	1.83826	0.0794625	2.29388	0.143846		30	1.83826	0.0794625	1.5675	0.0472263		30	1.95738	0.126618	1.83748	0.11186			1.98614	0.132061	2.24702	0.159107			1.83826	0.0794625	2.42257	0.135089			1.89046	0.0931749	2.3473	0.155488			1.80752	0.0920347	2.1453	0.114975
	35	1.80881	0.0778346	2.34575	0.16699		35	1.80881	0.0778346	1.58297	0.0525362		35	1.94075	0.124105	1.82585	0.111561			1.98479	0.126938	2.27089	0.1687			1.80881	0.0778346	2.54669	0.148796			1.87748	0.0912366	2.4074	0.164093			1.80541	0.0896368	1.94513	0.101203
