# Supplementary figures and images for: Control of neurotransmitter release by two distinct membrane-binding faces of the Munc13-1 C1C2B region
Source: eLife journal article supplement (doi:10.7554/elife.72030), 2021-11-15

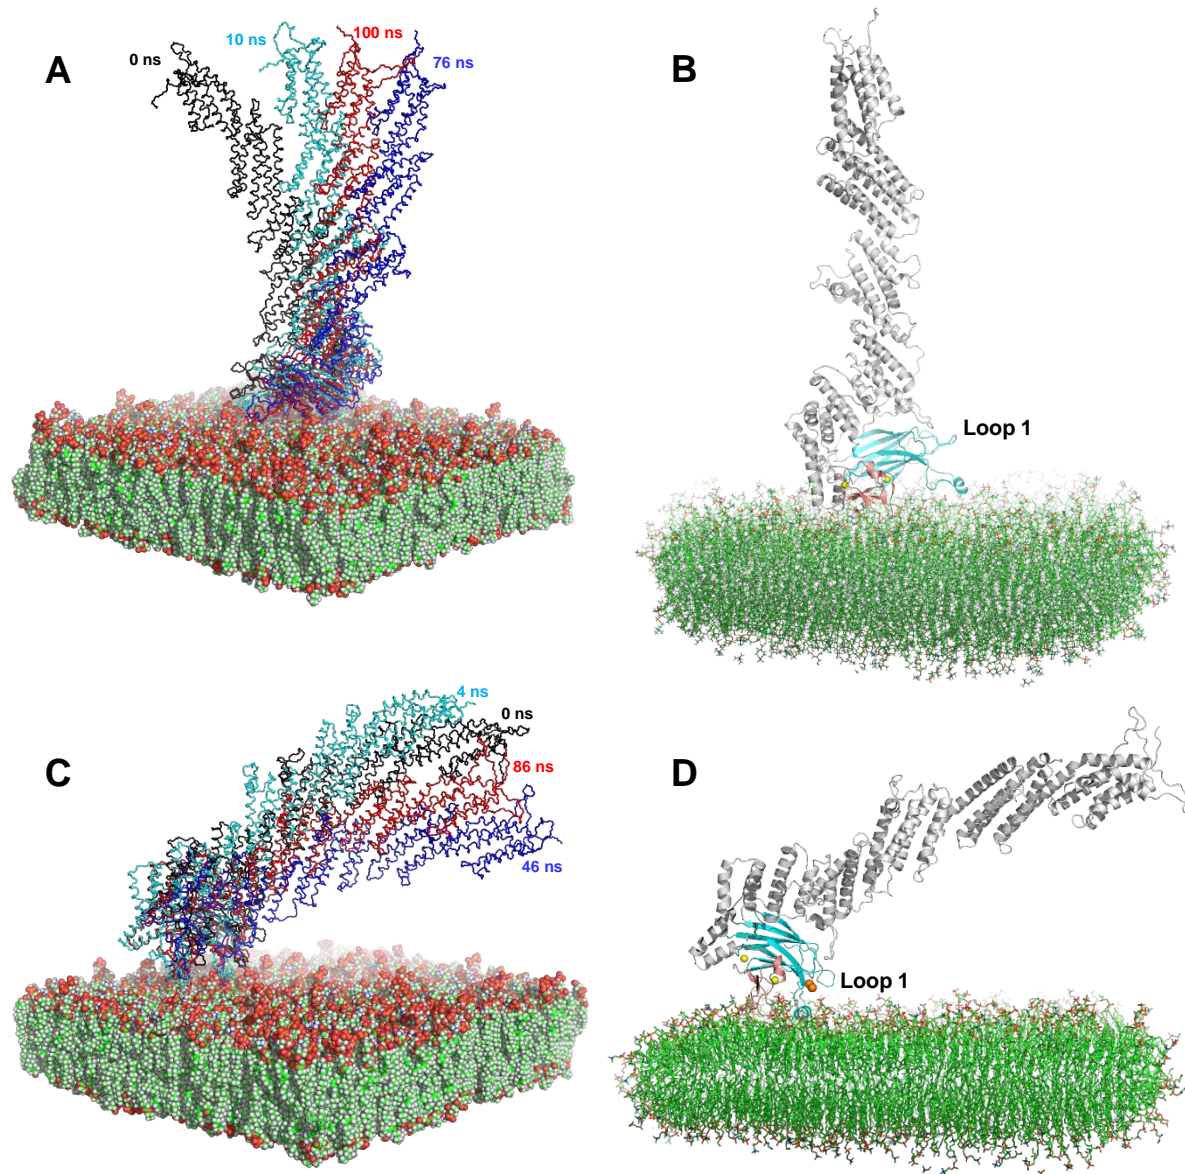

**Figure 1 – Figure supplement 1**  
Camacho et al.

Supplement: supp [file elife-72030-supp-v1.zip]

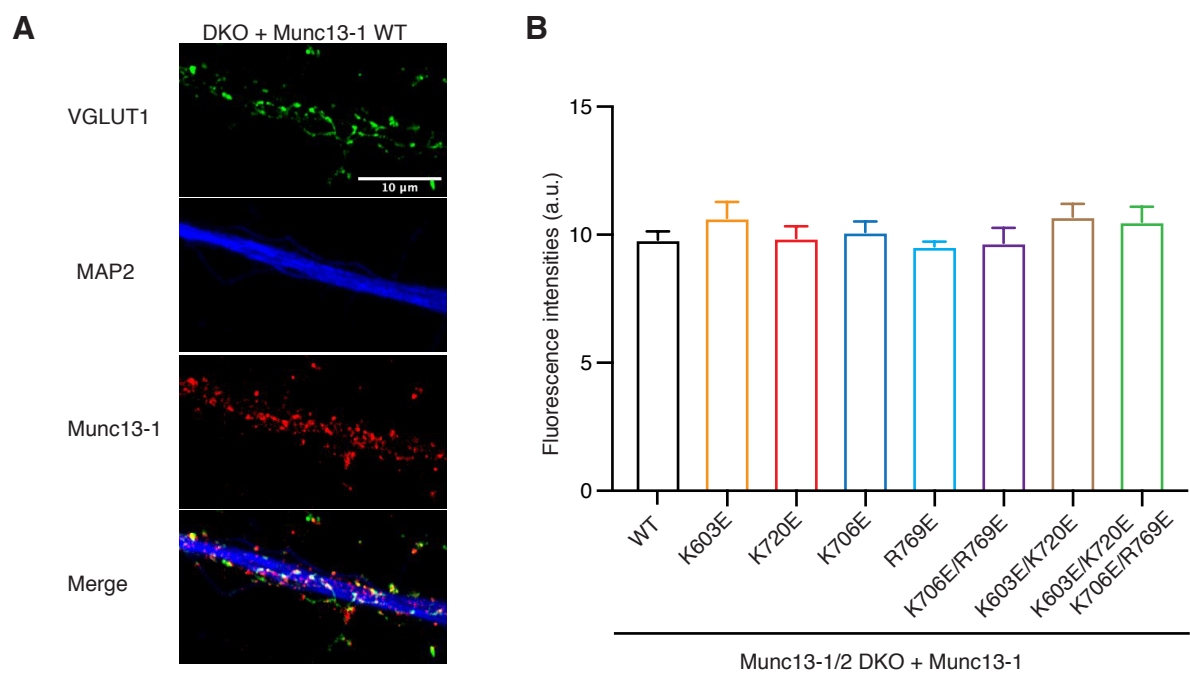

**Figure 6 - Figure supplement 1**  
**Camacho et al.**

Supplement: supp [file elife-72030-supp-v1.zip]

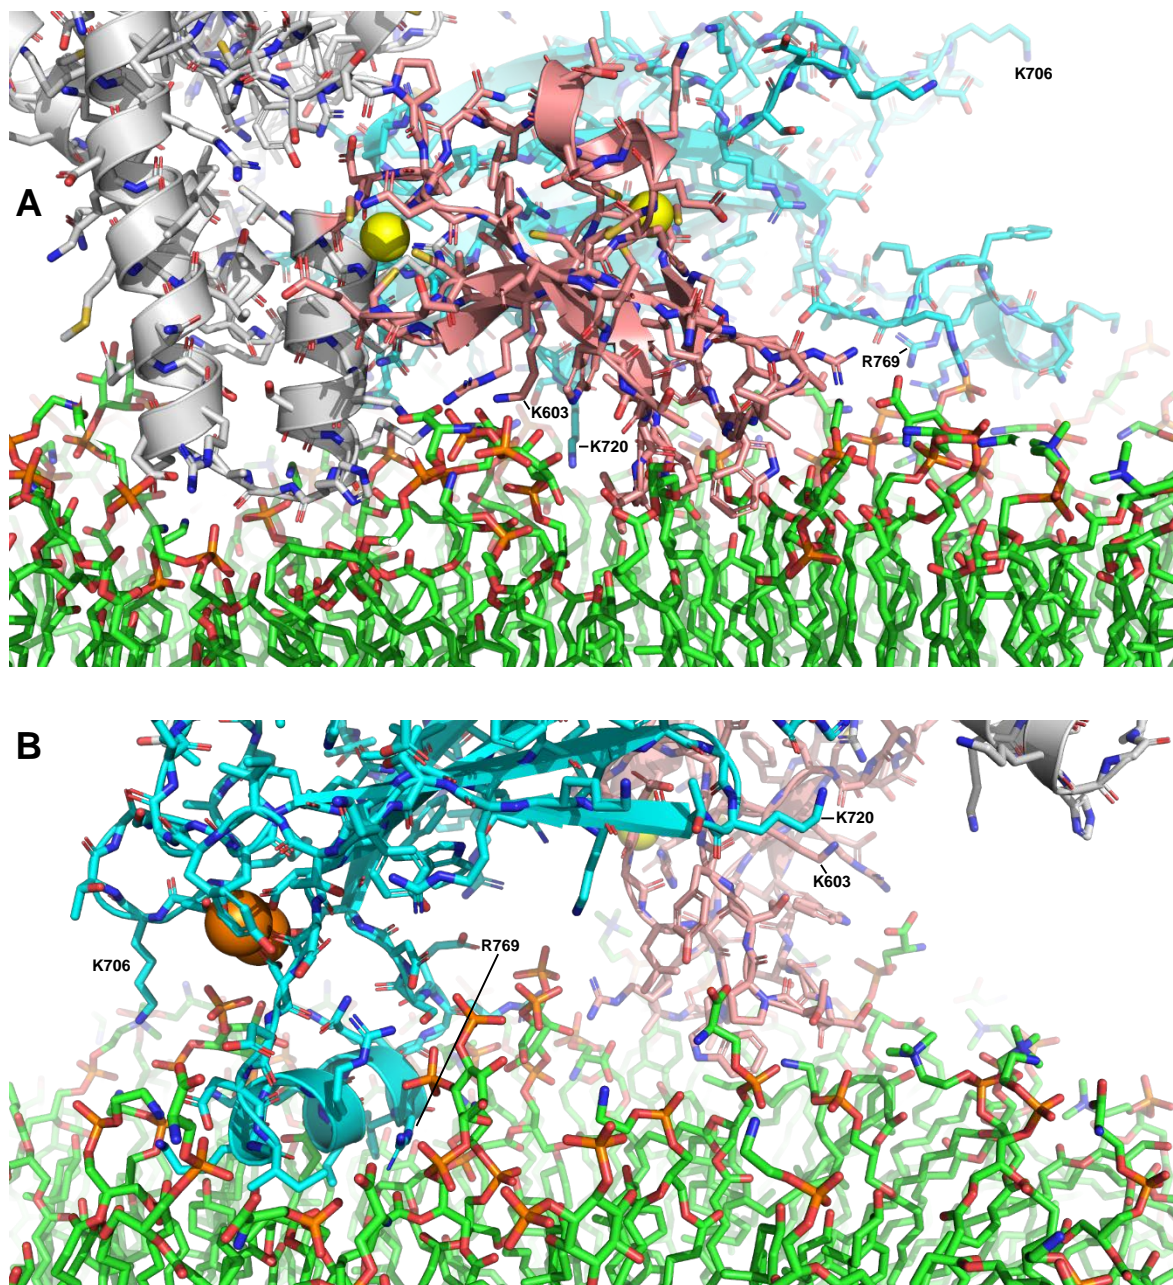

Figure 1 – Figure supplement 2  
Camacho et al.

Supplement: supp [file elife-72030-supp-v1.zip]

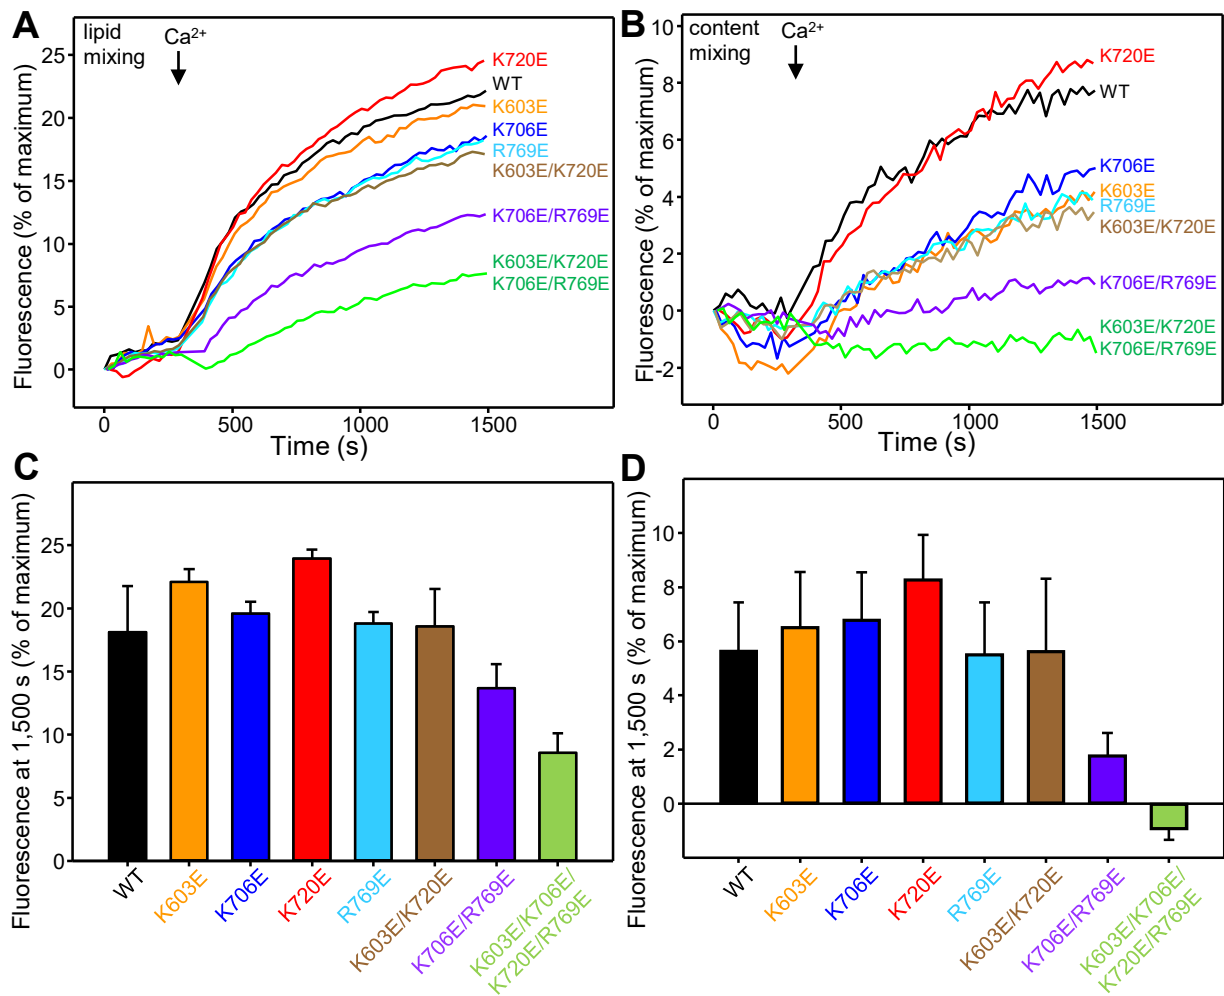

**Figure 5 – Figure supplement 1**  
Camacho et al.

Supplement: supp [file elife-72030-supp-v1.zip]

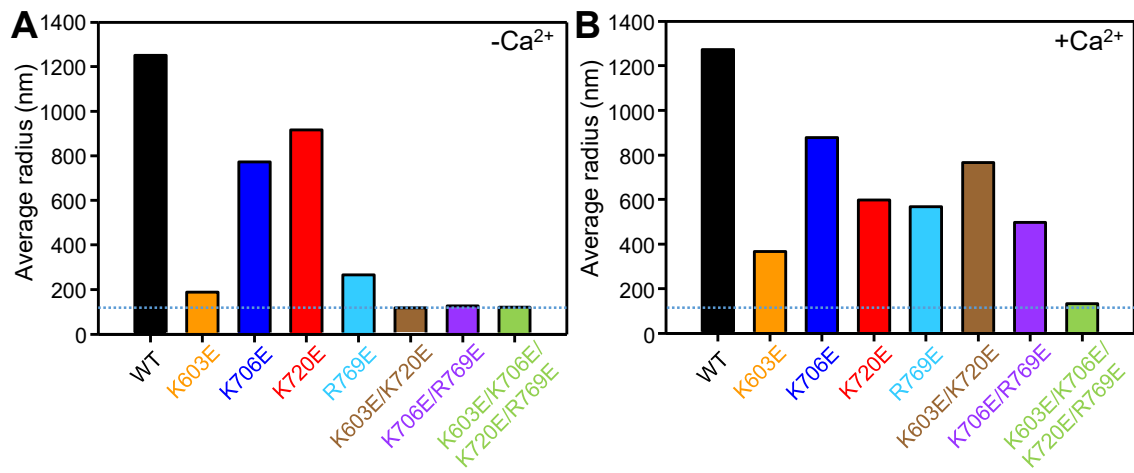

Figure 3 – Figure supplement 1  
Camacho et al.

Supplement: supp [file elife-72030-supp-v1.zip]

**A**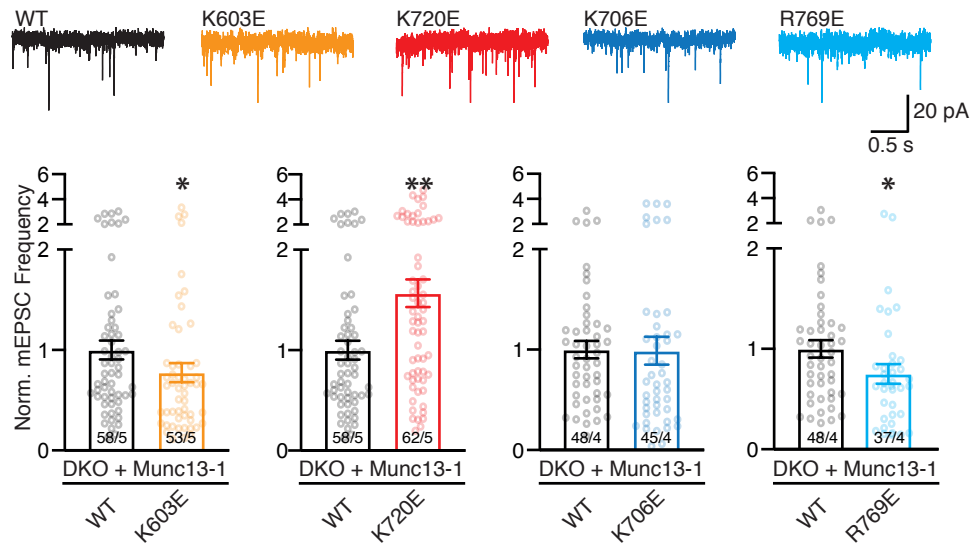**B**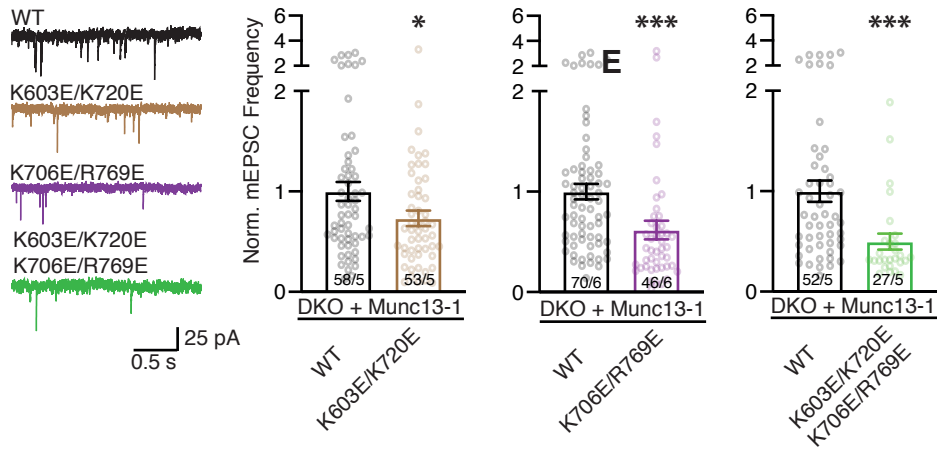

**Figure 6 - Figure supplement 2**  
**Camacho et al.**

Supplement: supp [file elife-72030-supp-v1.zip]
